# Supplementary material
Source: HighWire-hosted journal article supplement (https://bjgp.org/highwire/filestream/43998/field_highwire_adjunct_files/0/BJGP.2021.0700_suppl.pdf)
Supplement: BJGP.2021.0700_suppl.pdf [file BJGP.2021.0700_suppl.pdf]

## **Supplementary Data: Contents**

**Supplementary Appendix S1:** Study protocol.

**Supplementary Appendix S2:** Statistical analysis plan.

**Supplementary Appendix S3:** Final statistical analysis report.

**S3.1:** Table 1.1 Summary of screening data

**S3.2:** Table 2.1 Baseline characteristics of all screened patients

**S3.3:** Table 2.2 Baseline characteristics by randomised group

**S3.4:** Table 2.3 Baseline characteristics by stratification factors

**S3.5:** Table 3.1 Deaths and study retention

**S3.6:** Table 3.2 Deaths and study retention by stratification factors

**S3.7:** Table 3.3 Feasibility outcomes (Table in main text)

**S3.8:** Table 3.4 Feasibility outcomes by stratification factors

**Supplementary Appendix S4:** Additional qualitative data from interviews.

**S4.1:** Exemplar quotations illustrating different care planning styles

**S4.2:** Care planning styles from intervention group interviews

**S4.3:** Care planning styles from control group interviews

**Supplementary Appendix S5:** Final statistical analysis report continued.

**S5.1:** Table 4.1 EQ-5D-5L quality of life questionnaire results

**S5.2:** ICE-CAP wellbeing questionnaire results

Table 4.2a: Having a say

Table 4.2b: Being with people who care

Table 4.2c: Physical suffering

Table 4.2d: Emotional suffering

Table 4.2e: Dignity

Table 4.2f: Being supported

**S5.3:** Tables 4.3a and 4.3b CollaboRATE questionnaire results

**S5.4:** Table 4.4 Service use

**S5.5:** Table 4.5 Time to event data

## Supplementary Appendix S1: Study Protocol

### Early support in primary care for people starting treatment for cancer

|                                             |                                                                                                                                                                                                                                                                                                                            |
|---------------------------------------------|----------------------------------------------------------------------------------------------------------------------------------------------------------------------------------------------------------------------------------------------------------------------------------------------------------------------------|
| Sponsor                                     | <b>The University of Edinburgh</b><br><b>The Queen's Medical Research Institute</b><br><b>47 Little France Crescent</b><br><b>Edinburgh</b><br><b>EH16 4TJ</b>                                                                                                                                                             |
| Protocol authors                            | <b>Dr Kirsty Boyd</b>                                                                                                                                                                                                                                                                                                      |
| Funder                                      | <b>Macmillan Cancer Support</b>                                                                                                                                                                                                                                                                                            |
| Funding Reference Number                    | <b>6488086</b>                                                                                                                                                                                                                                                                                                             |
| Chief Investigator                          | <b>Dr Kirsty Boyd</b>                                                                                                                                                                                                                                                                                                      |
| Sponsor number                              | <b>AC18066</b>                                                                                                                                                                                                                                                                                                             |
| REC Number                                  | <b>18/WS/0135</b>                                                                                                                                                                                                                                                                                                          |
| Project registration                        | <b>ClinicalTrials.gov Identifier: NCT03719716</b>                                                                                                                                                                                                                                                                          |
| Version Number and Date                     | <b>GI-ACP_ Protocol: v2.1 2020-01-07</b>                                                                                                                                                                                                                                                                                   |
| IRAS Project ID                             | <b>243938</b>                                                                                                                                                                                                                                                                                                              |
| <u>Amendment classification and number:</u> | <b><u>Summary of change(s)</u></b><br><br>Non-substantial amendment v1.1 page 16; inform cancer clinicians of study entry 17 Jan 2019<br><br>Substantial amendment v2.0 – see IRAS amendment form 05 July 2019<br><br>Non-substantial amendment v2.1 page 9; clarification of primary endpoint description 07 January 2020 |

# CONTENTS

|           |                                                  |           |
|-----------|--------------------------------------------------|-----------|
| <b>1</b>  | <b>INTRODUCTION.....</b>                         | <b>8</b>  |
| 1.1       | BACKGROUND .....                                 | 8         |
| 1.2       | RATIONALE FOR STUDY .....                        | 8         |
| <b>2</b>  | <b>STUDY OBJECTIVES.....</b>                     | <b>9</b>  |
| 2.1       | OBJECTIVES.....                                  | 9         |
| 2.1.1     | Primary Objective .....                          | 9         |
| 2.1.2     | Secondary Objectives .....                       | 9         |
| 2.2       | ENDPOINTS.....                                   | 9         |
| 2.2.1     | Primary Endpoint.....                            | 9         |
| 2.2.2     | Secondary Endpoints .....                        | 9         |
| <b>3</b>  | <b>STUDY DESIGN .....</b>                        | <b>9</b>  |
| <b>4</b>  | <b>STUDY POPULATION.....</b>                     | <b>9</b>  |
| 4.1       | NUMBER OF PARTICIPANTS.....                      | 9         |
| 4.2       | INCLUSION CRITERIA .....                         | 9         |
| 4.3       | EXCLUSION CRITERIA.....                          | 9         |
| <b>5</b>  | <b>PARTICIPANT SELECTION AND ENROLMENT .....</b> | <b>10</b> |
| 5.1       | IDENTIFYING PARTICIPANTS.....                    | 10        |
| 5.2       | CONSENTING PARTICIPANTS.....                     | 10        |
| 5.2.1     | Withdrawal of study participants .....           | 10        |
| 5.3       | Co-enrolment .....                               | 10        |
| <b>6</b>  | <b>STUDY ASSESSMENTS .....</b>                   | <b>10</b> |
| 6.1       | STUDY ASSESSMENTS.....                           | 10        |
| 6.2       | LONG TERM FOLLOW UP ASSESSMENTS .....            | 11        |
| 6.3       | STORAGE AND ANALYSIS OF SAMPLES .....            | 11        |
| <b>7</b>  | <b>DATA COLLECTION .....</b>                     | <b>11</b> |
| 7.1       | Source Data Documentation .....                  | 11        |
| 7.2       | Case Report Forms.....                           | 11        |
| <b>8</b>  | <b>STATISTICS AND DATA ANALYSIS .....</b>        | <b>11</b> |
| 8.1       | SAMPLE SIZE CALCULATION .....                    | 11        |
| 8.2       | PROPOSED ANALYSES .....                          | 11        |
| <b>9</b>  | <b>ADVERSE EVENTS.....</b>                       | <b>19</b> |
| <b>10</b> | <b>OVERSIGHT ARRANGEMENTS .....</b>              | <b>12</b> |
| 10.1      | INSPECTION OF RECORDS .....                      | 12        |
| 10.2      | RISK ASSESSMENT .....                            | 12        |
| 10.3      | STUDY MONITORING AND AUDIT .....                 | 12        |
| <b>11</b> | <b>GOOD CLINICAL PRACTICE.....</b>               | <b>13</b> |
| 11.1      | ETHICAL CONDUCT .....                            | 13        |
| 11.2      | INVESTIGATOR RESPONSIBILITIES .....              | 13        |
| 11.2.1    | Informed Consent .....                           | 13        |
| 11.2.2    | Study Site Staff .....                           | 13        |

|        |                                                           |    |
|--------|-----------------------------------------------------------|----|
| 11.2.3 | Data Recording .....                                      | 13 |
| 11.2.4 | Investigator Documentation.....                           | 13 |
| 11.2.5 | GCP Training.....                                         | 13 |
| 11.2.6 | Confidentiality.....                                      | 14 |
| 11.2.7 | Data Protection .....                                     | 14 |
| 12     | STUDY CONDUCT RESPONSIBILITIES.....                       | 14 |
| 12.1   | PROTOCOL AMENDMENTS .....                                 | 14 |
| 12.2   | MANAGEMENT OF PROTOCOL NON COMPLIANCE .....               | 14 |
| 12.3   | SERIOUS BREACH REQUIREMENTS.....                          | 15 |
| 12.4   | STUDY RECORD RETENTION.....                               | 15 |
| 12.5   | END OF STUDY .....                                        | 15 |
| 12.6   | CONTINUATION OF TREATMENT FOLLOWING THE END OF STUDY..... | 15 |
| 12.7   | INSURANCE AND INDEMNITY .....                             | 15 |
| 13     | REPORTING, PUBLICATIONS AND NOTIFICATION OF RESULTS ..... | 16 |
| 13.1   | AUTHORSHIP POLICY.....                                    | 16 |
| 14     | REFERENCES.....                                           | 16 |

## LIST OF ABBREVIATIONS

|               |                                                                                                                                         |
|---------------|-----------------------------------------------------------------------------------------------------------------------------------------|
| <b>ACCORD</b> | Academic and Clinical Central Office for Research & Development - Joint office for The University of Edinburgh and Lothian Health Board |
| <b>ACP</b>    | Anticipatory Care Planning                                                                                                              |
| <b>AE</b>     | Adverse Event                                                                                                                           |
| <b>AR</b>     | Adverse Reaction                                                                                                                        |
| <b>CI</b>     | Chief Investigator                                                                                                                      |
| <b>CRF</b>    | Case Report Form                                                                                                                        |
| <b>ECOG</b>   | Eastern Cooperative Oncology Group                                                                                                      |
| <b>GCP</b>    | Good Clinical Practice                                                                                                                  |
| <b>GI</b>     | Gastrointestinal                                                                                                                        |
| <b>ICH</b>    | International Conference on Harmonisation                                                                                               |
| <b>KIS</b>    | Key Information Summary                                                                                                                 |
| <b>MDT</b>    | Multidisciplinary team                                                                                                                  |
| <b>PI</b>     | Principal Investigator                                                                                                                  |
| <b>PPI</b>    | Patient public involvement                                                                                                              |
| <b>QA</b>     | Quality Assurance                                                                                                                       |
| <b>RCT</b>    | Randomised controlled trial                                                                                                             |
| <b>REC</b>    | Research Ethics Committee                                                                                                               |
| <b>SAE</b>    | Serious Adverse Event                                                                                                                   |
| <b>SAR</b>    | Serious Adverse Reaction                                                                                                                |
| <b>SOP</b>    | Standard Operating Procedure                                                                                                            |
| <b>SUSAR</b>  | Suspected Unexpected Serious Adverse Reaction                                                                                           |

## INTRODUCTION

### 1.1 BACKGROUND

About 40% of people with cancer in the UK do not receive palliative care and many others get it too late; for just 10 weeks before death on average.<sup>1</sup> Delays are multifactorial including the association of palliative care with dying among patients, their informal carers and many health professionals leading to a focus on cancer treatment until the person is clearly deteriorating.<sup>2-4</sup> There is growing evidence that all people with incurable, progressive cancers would benefit from systematic and targeted support from diagnosis. This support should include physical, psychological and family care alongside well-coordinated care planning in the community that is integrated with hospital-based care.<sup>5-8</sup> Uncertainties can be acknowledged and addressed and proactive care avoids health and care crises by planning ahead to prevent avoidable admissions when patients deteriorate at home.<sup>9</sup> Hoping for the best while also planning for what might happen was found to be realistic and effective in recent trials of people with incurable cancer in the USA.<sup>10-12</sup> Quality of life improves, burdensome treatments of limited value are avoided and hospital deaths reduce. Early palliative care now needs to be developed and trialled in the UK.<sup>3</sup>

### 1.2 RATIONALE FOR STUDY

This study will evaluate the feasibility of a randomised controlled trial (RCT) of the provision of early palliative care including anticipatory care planning that is systematically triggered when patients with poor prognosis gastrointestinal cancers start palliative oncology treatment and is coordinated in primary care.

A Cochrane systematic review of completed and ongoing trials of early palliative care for adults with advanced cancer is now available.<sup>13</sup> The seven trials showed that in patients with advanced cancer, early palliative care may “slightly” increase quality of life and reduce symptom intensity. Effects on survival and depression were uncertain. One study reported more pain and reduced appetite. No adverse effects were reported in the others. Results from 20 ongoing studies and seven studies awaiting assessment may increase the evidence base for positive impacts of early palliative care. The reviewers noted that early palliative care is a newly emerging field so further well-conducted, controlled trials are a priority describing the timing, components and settings of early palliative care and control treatments.

Evidence for the effects of palliative care given later is still ambiguous because the time to establish beneficial effects may be too short.<sup>14-17</sup> Palliative interventions applied early, around the time of diagnosis of incurable cancer, may have positive effects on symptoms and disease management. Some investigators believe that a paradigm shift has already started where integrated palliative care as part of cancer care becomes the norm.<sup>18-20</sup> We have studied other reviews of early palliative care interventions for patients with advanced cancer to consider possible settings, interventions, evaluation tools and outcomes.<sup>21-28</sup> Early palliative care in cancer has so far almost exclusively been evaluated in the context of tertiary care, conceptualised as a complex intervention and consist of specialist palliative care integrated with ongoing oncological treatment as in the landmark Temel study.<sup>10</sup>

Trials of early palliative care delivered by other hospital specialists and primary care teams in the community are of strategic public health importance since most palliative care in the UK is in fact delivered by generalists supported by specialists. It is estimated that 75% of palliative care needs can be met by primary care teams: in the UK patients spend 90% of their last year of life living in the community. Systematic programmes to promote palliative care in the

community in five European countries have been reviewed recently but have not yet been evaluated in definitive controlled trials.<sup>29</sup>

We propose a timely and important feasibility randomised controlled trial of early generalist, palliative care. Findings will be highly relevant to the many people living with poor prognosis cancers across the UK where palliative care in the community is provided variably. This trial starts with early identification in hospital and is delivered in the community where the patient and carer will have an opportunity to discuss their illness and support needs and plan their future care.<sup>30</sup> Patients and their families will receive proactive support and care planning and primary care professionals will be involved from the outset. We will target care of people with inoperable oesophageal or gastric cancers or advanced pancreatic cancers because of their poor prognosis despite optimal cancer treatment (median survival 25 weeks).<sup>31-32</sup> Instead of waiting until people's health is deteriorating, we will evaluate the impact of offering coordinated, early support from their primary care team from the start of palliative chemotherapy or radiotherapy. A mixed-methods approach will be used in line with recommendations for palliative care research and clinical trial development.<sup>30, 33</sup>

Early palliative care, as advocated and reaffirmed in 2014 by the WHO, is already central to health and care policies across the UK.<sup>3</sup> The top priority of the Scottish Palliative and End-of-Life Framework is timely identification for palliative care. We will identify people with incurable cancer at initial diagnosis or relapse – a readily identifiable but rarely used time point when patients and families tend to experience significant distress.<sup>2</sup> This study aligns with national initiatives such as the Scottish Anticipatory Care Planning programme, UK guidance on cardiopulmonary resuscitation discussions and emergency treatment and care planning. UK primary care teams will coordinate palliative cancer care increasingly as the focus of health and social care shifts from hospital to community. 'Realistic Medicine' and 'Choosing Wisely' initiatives also seek to empower people to make informed choices about treatment and holistic care when they have an advanced illness.<sup>34-37</sup>

This study will also align with our work on shared decision-making in the Macmillan Cancer Support *Building on the Best* programme in Scotland and a recent Macmillan programme in NHS Fife offering specialist palliative care for all patients with lung cancer receiving best supportive care.<sup>38</sup> This feasibility, RCT starts earlier than the Fife project which systematised Best Supportive Care. We will evaluate patient and family experiences along with key service outcomes including hospital bed days, admissions, chemotherapy in the last phase of life, and place of death to identify suitable outcomes for a subsequent full RCT. We will also seek to identify any side-effects associated with introducing palliative care early as this aspect has been poorly studied. We have listed such possible harms in a recent review of early palliative care in Europe.<sup>29</sup>

## **2 STUDY OBJECTIVES**

### **2.1 OBJECTIVES**

#### **2.1.1 Primary Objective**

We aim to assess the feasibility and acceptability to patients and carers of a person-centred, care planning intervention based in primary care for people who have advanced oesophageal, gastric or pancreatic cancer within a feasibility phase 2, randomised controlled trial involving 50 participants.

### **2.1.2 Secondary Objectives**

- Establish if the trial methodology and care planning intervention are feasible, acceptable, deliverable and potentially cost effective for primary care teams and hospital specialists.
- To involve and empower patients with poor prognosis cancers and their families by offering them the Scottish Anticipatory Care Planning resources soon after diagnosis and facilitating their participation in early cancer care reviews with their GP and other members of the primary care team.
- To assess the feasibility of using various types of outcome measure in this context, and gather useful information on between and within patient variability which will inform the design of the future definitive Phase III trial.
- To map the patient journey from treatment planning to death or 12 month survival and evaluate the impact of the care planning intervention on participants' treatment choices, service use (including timing and costs of chemotherapy and/or radiotherapy and hospital inpatient bed days), care coordination (including use of the Scottish Key Information Summary – an electronic anticipatory care record) and place of death.
- Assess the feasibility of a subsequent, full RCT in terms of recruitment, retention and qualitative and quantitative data collection and to identify suitable primary and secondary outcomes

## **2.2 ENDPOINTS**

### **2.2.1 Primary Endpoint**

The main feasibility outcomes for this feasibility study are the proportion of eligible patients willing to be recruited and randomised, and the number in the intervention group who received at least one anticipatory care planning review at their GP practice documented in a new or updated KIS.

The primary trial outcome will be health related quality of life assessed using two validated, complementary tools: the EuroQol EQ-5D-5L and the ICECAP Supportive Care Measure.

### **2.2.2 Secondary Endpoints**

Formal evaluation of early palliative care interventions in the UK health context is essential. This study addresses an important evidence gap and for the first time the key role played by primary care in the delivery of widely accessible early palliative care. This study will yield important feasibility data to inform a multi-site RCT as follows:

- A multi-dimensional assessment of the feasibility and acceptability to patients and families of a randomised controlled trial (RCT) of person-centred, care planning for people who have advanced gastric, oesophageal or pancreatic cancer and are starting palliative chemotherapy/ radiotherapy.
- An assessment of the feasibility and acceptability of an RCT of proactive early palliative care intervention based in primary care with primary care teams and hospital specialists.
- An evaluation of the acceptability, experiences and impact of specific components of the trial intervention including the letter from the oncologist for the patient to take to their GP, anticipatory care planning including completion of a Key Information Summary, and early cancer care reviews in primary care from the perspectives of patients, families/ carers and GPs.



- An evaluation of the use of the new Scottish Anticipatory Care Planning resources from the perspectives of patients, families/ carers and GPs.
- An evaluation of the feasibility of capturing key person-centred outcomes with respect to quality of life, shared decision-making in an RCT, and the impact of proactive care planning on these aspects of patient experience.
- An in-depth understanding of the overall treatment and care experiences of people with poor prognosis oesophageal, gastric or pancreatic cancers and their families.
- A detailed care process map of the patient journey from treatment planning and starting chemotherapy/ radiotherapy to death or 12 month survival.
- An evaluation of the impact of a proactive, anticipatory care planning intervention on participants' treatment choices, service use (including the timing and standardised costs of chemotherapy and/or radiotherapy; oncology treatment within 30 and 90 days of death; and hospital inpatient bed days), care coordination (including use of the Scottish Key Information Summary) and place of death.
- Completion of a Phase 2 RCT that will support refinement of the intervention and inform planning for a subsequent, full RCT in terms of recruitment, retention and qualitative and quantitative data collection, identification of suitable primary and secondary outcomes, and power calculations.

### **3 STUDY DESIGN**

This is a 24-month feasibility randomised controlled trial of a care planning intervention, involving patients starting palliative oncology treatment in a Scottish regional cancer centre. Participants will be patients with a recent diagnosis of a poor prognosis cancer (first diagnosis or relapsed disease) who are being offered palliative chemotherapy or radiotherapy. The study methodology fits with the MRC Framework for evaluating complex healthcare interventions. The design builds on a similar RCT of anticipatory care planning for people with advanced heart disease. As recommended, we are using a mixed-methods approach integrating quantitative and complementary qualitative data collection. The Edinburgh Clinical Trials Unit will provide a customised, online randomisation service and will guide the trial design development, statistical analysis and reporting of the quantitative study data.

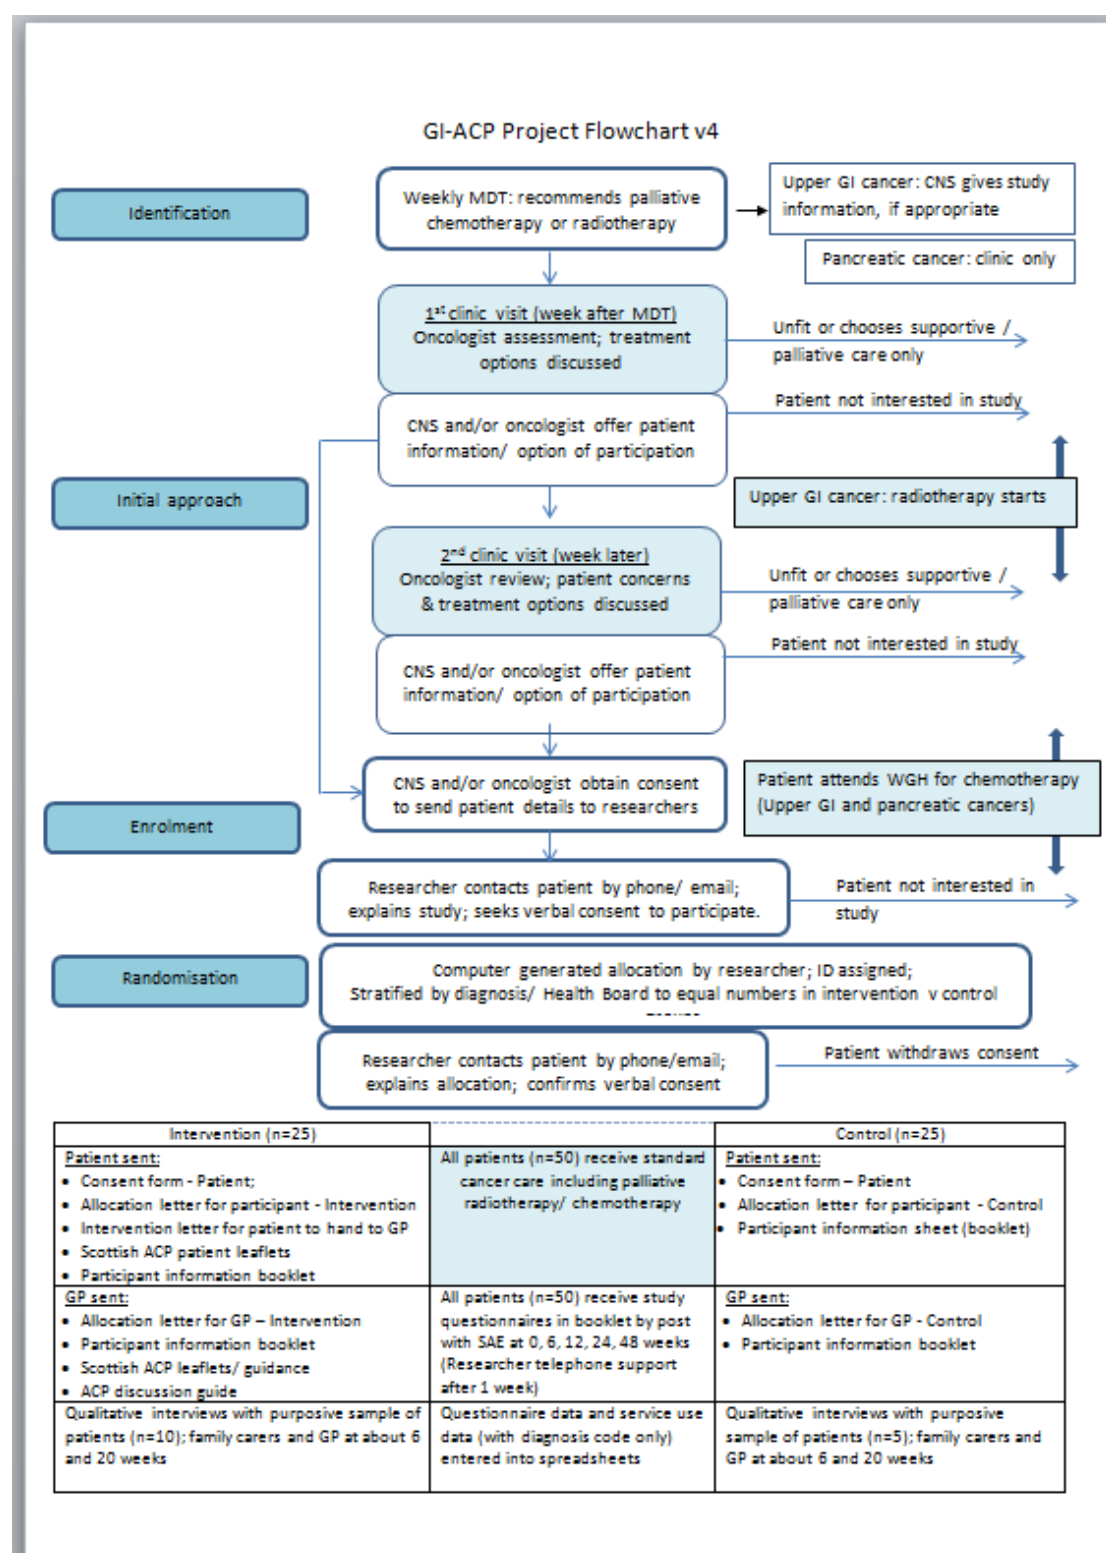

Study setting: The study will be conducted in NHS Lothian and NHS Fife – patients in these Boards are under the care of regional oncology services based at the Edinburgh Cancer Centre. Patients eligible for this study receive surgical care at the Royal Infirmary of Edinburgh (NHS Lothian) and are reviewed at the multi-disciplinary cancer care meetings there. We will identify eligible patients at those twice weekly meetings. Patients who are being offered palliative cancer treatment are then reviewed in oncology outpatient clinics in NHS Lothian and NHS Fife.

Patient recruitment and duration of involvement: The two consultant oncologists and the two clinical nurse specialists who are co-applicants will identify eligible participants, offer them information about the study and with their consent pass their contact details to the researcher who recruits and randomises 2-3 patients per week for 25 weeks using an online randomisation programme. A total number of 50 participants will be randomised to a) intervention: Early Contact group (n=25) b) control: Standard Care group (n=25) using a secure web-based randomisation system with a unique username and password for each researcher. Randomised allocations will be concealed until they are assigned. The randomisation will use computer-generated pseudo-random numbers to create random permuted blocks stratified by diagnostic group (gastrointestinal cancer or pancreatic cancer) and Health Board to ensure balance between the treatment arms in the number of patients with these characteristics.

Patients will remain in the study for up to 12 months unless they withdraw or die.

Trial Intervention: Intervention patients will receive a letter from their oncologist to take to their GP practice to support them in making an appointment with their general practitioner before or soon after starting treatment to discuss their ongoing care and support needs, and a copy of the new Scottish Anticipatory Care Planning (ACP) patient leaflets. A copy of this letter from the oncologist and ACP information for professionals will be sent to the GP practice with a request for the GP to review the patient, start a Key Information Summary (KIS), and offer regular cancer care reviews in primary care.

Quantitative data collection and analysis:

Participants in the intervention arm (n=25) and control arm (n=25) of the trial will be sent two questionnaires at baseline, 6, 12, 24 and 48 weeks after recruitment. Patient experiences and health related quality of life will be evaluated using the EuroQol EQ-5D-5L and the ICECAP Supportive Care Measure questionnaires.

The CollaboRATE measure of shared decision-making will also be completed at these time points to evaluate the most recent oncology consultation as this is a central tenet of high quality cancer care. The three questionnaires will be presented in a booklet that has been reviewed by our PPI advisory group and it will be sent to participating patients by post along with a freepost envelope for their return. The researcher will contact the patient by phone a week after the questionnaire booklet is sent out to help support completion.

Participants in the intervention arm (Early Contact group) will be asked a supplementary question about the value of the Scottish ACP leaflets and whether their GP discussed having an anticipatory care plan or KIS.

The questionnaire data for each participant will be identified by a unique study number and entered into a spreadsheet for analysis by a statistician from the Edinburgh Trials unit. We will obtain data from participants about their reported quality of life and experiences of care including shared decision-making. As this is a feasibility trial, we will also monitor questionnaire completion and return rates along with attrition generally.

### Qualitative data generation and analysis

There is also conduct a nested qualitative study. This is best practice to refine the intervention and its evaluation. We will triangulate views of patients, informal carers and GPs to understand how this intervention is perceived and could be improved. Interviews will explore people's views about participating in the trial, and the survey instruments as well as their experiences of treatment and care of people with poor prognosis GI or pancreatic cancers.

The researcher will conduct interviews in the patient's home at about 6 weeks and again at about 20 weeks to provide a longitudinal perspective. We will interview a purposive sample of 15 patients (10 intervention group and 5 control group), their nominated informal/ family carer and their GP (20-30 minute telephone interview). If a patient dies between the interviews, we will seek a carer bereavement interview and interview the GP. Our experience suggests about half of patients and carers prefer a joint interview so patients and carers will be offered this option. Carer perspectives will explore whether the intervention should be extended to highlight carer needs systematically.

### Service data

Routine service use data collected for both groups from hospital electronic records and the oncology patient database by the cancer clinicians and the principal investigator. These data will be collected to map the care journey of both intervention (25) and control (25) patients from treatment planning to death or for up to 12 months. Hospital electronic records and the cancer patient database will be used along with primary care and palliative care service data obtained by phone. Includes:

Anonymised service use and questionnaire data will be analysed using descriptive statistics at each follow-up time point and using change from baseline. Interviews will be recorded using an encrypted digital recorder, anonymised, fully transcribed and analysed using a thematic approach together with field notes within and across cases and integrated with the service use and questionnaire data. Standard costings will be applied to service data collected where feasible with support from a health economist in the Clinical Trials Unit, and guided by costs used in a previous study by co-applicant JB.

### **Project time scale and milestones**

Months -3 to 0:

- Preparation and submission of applications for Ethics and R&D review.
- Meetings with the PPI representatives and advisory group to prepare the participant information booklet and the intervention letter from the oncologist for the Early Contact group patients to take to their GP.
- Randomisation process confirmed and set up by the Edinburgh Clinical Trials Unit
- Researcher appointment confirmed and research passport sought.

Months 1-4

- Ethics, R&D approvals and research passport obtained
- Information about study circulated to relevant clinical departments
- Briefing of relevant clinicians about identification and recruitment procedures
- Documentation prepared including patient letters & questionnaires.
- Formats agreed for collecting routine clinical and research data and set up.

Months 4-9

- Oncology nurses (LG and NB who are co-applicants) identify and the researcher recruits and randomises 2 patients per week for 25 weeks (n=50)
- Research team sends all patients (n=50) questionnaires at 0, 6, 12, 24 and 48 weeks after recruitment .

- Researcher conducts a nested qualitative study and interviews with 10 intervention and 5 control patients and their linked family carer at about 6 and 20 weeks

Months 4-16

- Research administrator collates and inputs anonymised clinical, questionnaire and service usage data for analysis by Trials Unit statistician.

Months 5-16

- Researcher generates and analyses qualitative data. Research secretary anonymises and transcribes interviews for analysis. Ongoing data analysis to inform second interviews. Regular review of progress and emerging themes by PPI group and steering group members.

Month 10-22

- Research team and cancer clinicians collect routine clinical/ service use data.

Month 21-24

- Complete and integrate quantitative and qualitative data analyses.
- Write report for funder and academic publications. All to contribute, including some PPI group members
- Start wide dissemination through Scottish Research Forum, and oncology networks
- Consider proposal for UK, multi-centre intervention trial.

## **4 STUDY POPULATION**

### **4.1 NUMBER OF PARTICIPANTS**

50 patients with poor prognosis cancers randomised to intervention or control

15 family carers invited for interview (10 intervention 5 control)

15 GP interviews with linked cases (10 intervention 5 control)

### **4.2 INCLUSION CRITERIA**

People aged 18 or over with advanced, inoperable oesophageal, gastric or pancreatic cancers being offered palliative chemotherapy and/or radiotherapy are eligible. Newly diagnosed patients and patients whose cancer has relapsed after radical treatment who choose to have palliative chemotherapy and/or radiotherapy aimed at reducing cancer progression but not cure are eligible. Patients will come from two Health Boards and have diverse demography.

The Lothian interpreter service (used for all translation work with patients/ families NHS practice) may be used for patients/ carers who do not speak English or who communicate through British Sign Language.

### **4.3 EXCLUSION CRITERIA**

- People too ill to participate or give informed consent.
- Patient who are not fit for oncology treatment or who opt for best supportive care.
- People with other life-limiting conditions likely to cause death within 6 months.
- People with moderate to severe cognitive impairment that precludes completions of questionnaires or participation in interviews.
- People unable to give informed consent or communicate by telephone with the researcher.

### **4.4 CO-ENROLMENT**

We are aware of two other trials currently open to similar participants. One is a chemotherapy drug trial recruiting very small number of participants who have gastrointestinal cancers and

specific treatment criteria. The other is a trial of nutritional supplements, self directed exercise and anti-inflammatory medication for which a few of the patients with pancreatic cancer may be eligible

This study does not involve any additional medications, investigations or hospital visits so can be considered 'low burden'. Eligibility is much wider than for the other two studies so we anticipate that there will be many more people able to participate than in the other studies and that there will be no co-enrolment.

## **5 PARTICIPANT SELECTION AND ENROLMENT**

### **5.1 IDENTIFYING PARTICIPANTS**

All patients with a new diagnosis of gastrointestinal or pancreatic cancers or relapsed cancer are reviewed at the weekly cancer multi-disciplinary team meetings at the Royal Infirmary of Edinburgh attended by the two consultant oncologists, the consultant surgeon and the clinical nurse specialists who are co-applicant for this study. These clinicians are those caring for eligible participants. They will identify potential participants and offer them information about the study when the patient is attending their initial or second oncology outpatient clinic.

If an eligible patient is interested in talking with the study researcher about taking part in the study, they will be asked by their cancer clinicians to give written consent for their contact details to be passed to the research team. This information will be recorded on a participant contact information sheet by their cancer clinician, scanned and emailed from a secure NHS account to the study 'nhs.net' account only accessible to the study principal investigator, the researcher and the study administrator.

Participating patients who are selected for the qualitative component of the study will be asked by the researcher for their permission for her to approach their main informal carer and their GP for interview.

Once a patient has consented to take part in the study their GP will be informed by the research team.

### **5.2 CONSENTING PARTICIPANTS**

The study researcher (Marilyn Kendall) will be taking informed consent from all participants.

- Recruitment of patients for randomisation:

The researcher will contact each new potential participant by phone or email (according to their preference) a minimum of two working days after receiving the person's contact details from their cancer clinician. During the telephone contact the researcher will outline the project and answer questions. The potential participant will be asked if they wish to take part, wish to decline or wish further time to consider. It will be made clear that even if they consent to take part at this time that they can change their mind subsequently. The researcher will seek verbal consent to randomise them. She will arrange a convenient time to phone back with the outcome of the randomisation.

- Confirmation of consent and permission to send research packs with questionnaires:

The researcher will complete the randomisation using a customised online programme developed by the Edinburgh Trials Unit which generates a study number and will be set up to stratify participants by diagnosis (GI cancer or pancreatic cancer) and by Health Board to ensure a diverse sample. She will phone back and inform the person if they have been randomised to the intervention or control group and answer any questions about what that

means. She will confirm verbal consent and explain that the participant will be sent their research pack in the post by the study administrator along with a consent form which they are asked to sign and return with the questionnaire booklet. A copy of the consent form for the participant to keep will be enclosed.

- Follow-up and confirmation of consent to remain in the study:

A week before each questionnaire pack is due to be sent (6, 12, 24, 48 weeks), the researcher will contact the participant again by phone to confirm they are able and willing to continue in the study.

- Consent for interview (patient and carer):

For participants sampled for interview at 6 weeks, the researcher will seek verbal consent to interview by phone at the same time as contacting the participant about the 6 week questionnaire pack. If the participant agrees to interview, the researcher will arrange a convenient time to interview the person in their own home. The consent form includes a request that the person agree to interview so any participant who has not consented to interview will not be approached.

At the same time, the participant will also be asked by the researcher if their main family/informal carer would be willing to take part in an interview as well. An informal carer is close family member or friend who a patient participating in this project has nominated as someone who takes the lead in helping look after them whether or not this person is considered by either party as a "carer." The researcher will ask the participant to invite their carer to contact her by phone or email to talk about the study and taking part. When contacted by the carer, the researcher will verbally outline the project and answer questions. The informal carer will be asked if they wish to take part, wish to decline or wish further time to consider. It will be made clear that even if they consent to take part at this time that they can change their mind subsequently. Verbal consent will be obtained by phone and the interview arranged at a time and place to suit the carer. A carer letter and participant information booklet will be sent to the carer by the researcher.

Our experience in similar studies is that most carers opt for a joint interview with the patient but each carer will be given the option of a shared interview or a separate interview at a convenient time and place for them. Written consent

Each carer will have an opportunity to ask the researcher questions about the study and will be asked to complete a written consent form at the start of their interview.

For the follow-up interviews at about 20 weeks, the researcher will phone the patient and their informal carer about a week beforehand to check they are able and willing to take part and make arrangements to conduct the interview. Consent will be confirmed at the start of each interview. If a patient dies between the first and second interview, their informal carer will be approached 6-8 weeks later and asked to agree to a bereavement interview.

Consent for interview (GP):

The GP of all participants will have been informed by letter at the start of the study that their patient is taking part and the person's allocation group. The GP will have been sent a copy of the participant information booklet and an explanation that some GPs will be approached for interview at 6 and 12 weeks with the participant's consent.

If a patient is participating in the interview component of the study, they will be asked for the name of the GP they have had most contact with recently and for permission to approach that GP for an interview about the person's treatment and care. The researcher will then contact the GP at the practice to invite them to participate in a telephone interview. During the telephone contact the researcher will verbally outline the project and answer questions. The GP will be asked if they wish to take part in an interview, wish to decline or wish further time

to consider. It will be made clear that even if they consent to take part at this time that they can change their mind subsequently. They will be offered another copy of the participant information booklet and given a minimum of two working days to decide if they wish to participate

Written consent will be obtained by emailing the consent form to the practice and asking the GP to return it to the study administrator for secure storage before or after their interview. The telephone interview will be arranged with the GP for a convenient time. The GPs of any patients who die between the first and second interview will still be approached for interview.

### **5.2.1 Withdrawal of Study Participants**

Participants are free to withdraw from this study at any point or a participant can be withdrawn by their cancer clinician or GP if their health deteriorates. If withdrawal occurs, the primary reason for withdrawal will be documented in the participant's case report form.

The participant will be asked for written consent but will always have the option of withdrawal from:

(i) All aspects of the trial but continued use of data collected up to that point

(ii) All aspects of the trial with removal of all previously collected data.

Given that this study involves people with poor prognosis cancers, we expect that there will be a number of withdrawals due to deteriorating health or death.

The cancer clinicians and study principal investigator (an NHS Lothian consultant) will monitor the patient's electronic records to identify if any participating patients have died so that they are withdrawn in a timely manner.

## **5.3 STUDY ASSESSMENTS**

### 0 weeks (baseline assessments)

Completion of booklet containing 3 questionnaires to be returned by post (50 patients)

### 6-8 weeks

Completion of booklet containing 3 questionnaires to be returned by post (50 patients)

Interview at home of patient with carer or separately by researcher (15)

### 12 weeks

Completion of booklet containing 3 questionnaires to be returned by post (50 patients)

### 20-24 weeks

Interview at home of patient with carer or separately by researcher (15)

### 24 weeks

Completion of booklet containing 3 questionnaires to be returned by post (50 patients)

### 48 weeks

Completion of booklet containing 3 questionnaires to be returned by post (50 patients)

## **5.4 LONG TERM FOLLOW UP ASSESSMENTS**

Not applicable: there will be no long-term follow-up beyond the 12 months of the study.



## 6 DATA COLLECTION

Demographic data will be collected by the participants' cancer clinicians.

These data are: name, CHI number, date of birth, contact details, address, postcode (for deprivation score) GP practice name/ number, preferred GP's name.

Clinical data, cancer treatment and service use data will be collected by the participants' cancer clinicians and/or the principal investigator (an NHS Lothian consultant). These data are: gender, cancer diagnosis, new or recurrent disease, disease extent, surgical treatment given (if any), initial oncology treatment plan, social support/ marital status (if available), initial ECOG performance status, major co-morbidities, agreed oncology treatment plan, oncology treatments given, reasons/outcomes of hospital admissions, KIS review, place of death, main underlying cause of death.

Key dates to be recorded for a 'timeline' include:

Initial MDT review meeting, date of 1<sup>st</sup> oncology clinic visit, date recruited and randomised, dates of oncology clinic visits for review, date of final oncology treatment, dates of GP practice visits, dates of hospital admissions, date of death

Questionnaire data will be collected by post with study packs being sent to the patient's home address by the study administrator. The researcher (Marilyn Kendall) will follow-up the patient by phone a week before sending out the questionnaires and 1 week after the questionnaires have been sent out to offer support and help with completion.

- EuroQol EQ-5D-5L  
(<https://euroqol.org/eq-5d-instruments/eq-5d-5l-about/>)
- ICECAP Supportive Care Measure – University of Birmingham  
(<https://www.birmingham.ac.uk/research/activity/mds/projects/HaPS/HE/ICECAP/Evaluation-of-End-of-Life-Care/ICECAP-SCM.aspx>)
- CollaboRATE shared decision-making evaluation tool  
<https://www.ncbi.nlm.nih.gov/pmc/articles/PMC3906697/>

The researcher will record the patient, carer and GP interviews using an encrypted digital recorder that meets NHS standards. The files will be transferred to a password protected folder on a University of Edinburgh computer and deleted from the recorder before being transcribed with no person identifiable data by the study administrator. The transcriptions will be entered into NVivo (qualitative data analysis package) for subsequent analysis.

### 6.1 Source Data Documentation

- Patient contact agreement sheet with contact details (secure storage)
- Patient clinical information and service use recording sheet (secure storage)
- Questionnaires EQ-5D, ICE-CAP and CollaboRATE made up as a booklet for participants to complete
- Transcripts of interviews – anonymised for primary analysis and storage for potential future analyses.

## **6.2 Case Report Forms**

Data from the patient clinical record sheets and from the questionnaire booklets to be entered into a spreadsheet (using participant study ID as the identifier) - for analysis by the Edinburgh Clinical Trials Unit statistician.

## **7 STATISTICS AND DATA ANALYSIS**

### **7.1 SAMPLE SIZE CALCULATION**

The number of participants and timing of the data collection is planned expecting that 50% of patients will die by 6 months. The sample size of 50 (25 per group) will provide acceptable precision in estimating feasibility outcomes:

1. Proportion of patients screened for the trial willing to consent and be randomised.
2. Proportion of patients who are still alive retained in the study through all follow-up time points (any difference in retention between intervention and usual care groups).
3. In the intervention group, proportion of patients who do make an appointment with their GP to discuss their ongoing care and support needs.

If the true conversion rate from screening to consent is 50%, then the 95% confidence interval for our estimate of the screening to consent conversion rate will have width  $\pm 9.8\%$ . Similarly, the confidence interval width for the proportion of participants randomised to the intervention who actually make a GP appointment to discuss their ongoing care and support needs will have width ranging from  $\pm 11.8\%$  to  $\pm 19.6\%$ .

### **7.2 PROPOSED ANALYSES**

Analysis of the quantitative data will largely consist of descriptive statistics and comparison between the intervention and control groups.

Throughout, continuous variables will be summarised by treatment group and overall using the mean, standard deviation, median, lower quartile, upper quartile, minimum and maximum values. Categorical variables will be reported by treatment group and overall using the frequency and percentage for each category.

Baseline demographic and clinical data will be summarised by treatment arm and overall.

Each of the primary feasibility outcomes (proportion of eligible patients willing to consent and be randomised; proportion of patients randomised to the intervention arm who do make an appointment with their GP to discuss their ongoing care and support needs) will be analysed by calculating the proportion and its exact binomial 95% confidence interval.

The proportion of participants in each treatment arm retained in the study through all follow-up time points will be analysed in the same manner. Furthermore, the difference in retention proportions between treatment arms will be calculated, along with its 95% confidence interval calculated using the normal approximation to the binomial distribution.

Clinical outcomes EQ-5D-5L, ICE-CAP and CollaboRATE will be summarised by treatment arm and overall.

As this is a feasibility study, there will be no imputation of missing data; the missing data rates will be reported by treatment group to inform on trial feasibility. Descriptive summaries of the baseline demographic and clinical data and primary and secondary outcomes will also be provided for the subgroups defined by the randomisation strata: diagnostic group

(gastrointestinal or pancreatic) and Health Board. The intention to treat principle will be followed in all analyses. There are no formal interim analyses planned.

Qualitative data analysis will be supported by use of the data analysis package NVivo. The researcher has extensive experience of using this programme in similar qualitative interview studies. The interviews will be coded and analysed thematically within and across cases and longitudinally in line with established methods for narrative analysis.

## **8 ADVERSE EVENTS**

We consider this study to have a low level of risk to participants. It is possible that some participants may be upset by thinking and talking about their health and wellbeing and the impact of a cancer diagnosis and treatment. They will have standard care support from their cancer nurse specialist and the project researcher will be in regular contact to support participants with the questionnaire completion and any concerns they may have about the study. She is a senior social scientist with extensive experience of conducting potentially sensitive interviews with people living with advanced and life-limiting conditions.

We will monitor the study patients carefully so that any change in their condition including deteriorating health or death is identified and addressed. This will include proactive checks made by the clinical team as part of routine monitoring and care. The clinical team will update the research team if there are any changes that might impact on a participant continuing in the study as well as if they die. The researcher will talk with participants about contacting them before each study pack of questionnaires is posted out to check that they are still able and consent to receive it. In our previous longitudinal studies, having a single researcher in regular contact with participants enables rapport to be established such that people feel supported by regular contacts and able to withdraw at any time without difficulty.

## **9 OVERSIGHT ARRANGEMENTS**

### **9.1 INSPECTION OF RECORDS**

Investigators and institutions involved in the study will permit trial related monitoring and audits on behalf of the sponsor, REC review, and regulatory inspection(s). In the event of audit or monitoring, the Investigator agrees to allow the representatives of the sponsor direct access to all study records and source documentation. In the event of regulatory inspection, the Investigator agrees to allow inspectors direct access to all study records and source documentation. Consent for this access will be obtained from participants.

### **9.2 RISK ASSESSMENT**

A study specific risk assessment has been performed by ACCORD in accordance with ACCORD governance arrangements and the study has been designated as low risk not requiring planned monitoring although some monitoring may occur.

### **9.3 STUDY MONITORING AND AUDIT**

The ACCORD Sponsor Representative has assessed the study and decided that no independent risk assessment is required.

## **10 GOOD CLINICAL PRACTICE**

### **10.1 ETHICAL CONDUCT**

The study will be conducted in accordance with the principles of the International Conference on Harmonisation Tripartite Guideline for Good Clinical Practice (ICH GCP).

Before the study can commence, all required approvals will be obtained and any conditions of approvals will be met.

### **10.2 INVESTIGATOR RESPONSIBILITIES**

The Investigator is responsible for the overall conduct of the study at the site and compliance with the protocol and any protocol amendments. In accordance with the principles of ICH GCP, the following areas listed in this section are also the responsibility of the Investigator. Responsibilities may be delegated to an appropriate member of study site staff.

#### **10.2.1 Informed Consent**

The Investigator is responsible for ensuring informed consent is obtained before any protocol specific procedures are carried out. The decision of a participant to participate in clinical research is voluntary and should be based on a clear understanding of what is involved.

Participants must receive adequate oral and written information – appropriate Participant Information and Informed Consent Forms will be provided. The oral explanation to the participant will be performed by the Investigator or qualified delegated person, and must cover all the elements specified in the Participant Information Sheet and Consent Form.

The participant must be given every opportunity to clarify any points they do not understand and, if necessary, ask for more information. The participant must be given sufficient time to consider the information provided. It should be emphasised that the participant may withdraw their consent to participate at any time without loss of benefits to which they otherwise would be entitled.

The participant will be informed and agree to their medical records being inspected by regulatory authorities and representatives of the sponsor(s).

The Investigator or delegated member of the trial team and the participant will sign and date the Informed Consent Form(s) to confirm that consent has been obtained. The participant will receive a copy of this document and a copy filed in the Investigator Site File (ISF) and participant's medical notes (if applicable).

#### **10.2.2 Study Site Staff**

The Investigator must be familiar with the protocol and the study requirements. It is the Investigator's responsibility to ensure that all staff assisting with the study are adequately informed about the protocol and their trial related duties.

#### **10.2.3 Data Recording**

The Principal Investigator is responsible for the quality of the data recorded in the CRF at each Investigator Site.

#### **10.2.4 Investigator Documentation**

The Principal Investigator will ensure that the required documentation is available in local Investigator Site files ISFs.

### **10.2.5 GCP Training**

For non-CTIMP (i.e. non-drug) studies all researchers are encouraged to undertake GCP training in order to understand the principles of GCP. However, this is not a mandatory requirement unless deemed so by the sponsor. GCP training status for all investigators should be indicated in their respective CVs.

Professor Weir (Edinburgh Trials Unit) has GCP training, as indicated in his CV and the study researcher and PI will complete this before recruitment starts.

### **10.2.6 Confidentiality**

All laboratory specimens, evaluation forms, reports, and other records must be identified in a manner designed to maintain participant confidentiality. All records must be kept in a secure storage area with limited access. Clinical information will not be released without the written permission of the participant. The Investigator and study site staff involved with this study may not disclose or use for any purpose other than performance of the study, any data, record, or other unpublished, confidential information disclosed to those individuals for the purpose of the study. Prior written agreement from the sponsor or its designee must be obtained for the disclosure of any said confidential information to other parties.

### **10.2.7 Data Protection**

All Investigators and study site staff involved with this study must comply with the requirements of the General Data Protection Regulation (2018) with regard to the collection, storage, processing and disclosure of personal information and will uphold the Act's core principles. Access to collated participant data will be restricted to individuals from the research team treating the participants, representatives of the sponsor(s) and representatives of regulatory authorities.

Computers used to collate the data will have limited access measures via user names and passwords.

Published results will not contain any personal data that could allow identification of individual participants.

## **11 STUDY CONDUCT RESPONSIBILITIES**

### **11.1 PROTOCOL AMENDMENTS**

Any changes in research activity, except those necessary to remove an apparent, immediate hazard to the participant in the case of an urgent safety measure, must be reviewed and approved by the Chief Investigator.

Amendments will be submitted to a sponsor representative for review and authorisation before being submitted in writing to the appropriate REC, and local R&D for approval prior to participants being enrolled into an amended protocol.

### **11.2 MANAGEMENT OF PROTOCOL NON COMPLIANCE**

Prospective protocol deviations, i.e. protocol waivers, will not be approved by the sponsors and therefore will not be implemented, except where necessary to eliminate an immediate

hazard to study participants. If this necessitates a subsequent protocol amendment, this should be submitted to the REC, and local R&D for review and approval if appropriate.

Protocol deviations will be recorded in a protocol deviation log and logs will be submitted to the sponsors every 3 months. Each protocol violation will be reported to the sponsor within 3 days of becoming aware of the violation. All protocol deviation logs and violation forms should be emailed to [QA@accord.scot](mailto:QA@accord.scot)

Deviations and violations are non-compliance events discovered after the event has occurred. Deviation logs will be maintained for each site in multi-centre studies. An alternative frequency of deviation log submission to the sponsors may be agreed in writing with the sponsors.

### **11.3 SERIOUS BREACH REQUIREMENTS**

A serious breach is a breach which is likely to effect to a significant degree:

- (a) the safety or physical or mental integrity of the participants of the trial; or
- (b) the scientific value of the trial.

If a potential serious breach is identified by the Chief investigator, Principal Investigator or delegates, the co-sponsors ([seriousbreach@accord.scot](mailto:seriousbreach@accord.scot)) must be notified within 24 hours. It is the responsibility of the co-sponsors to assess the impact of the breach on the scientific value of the trial, to determine whether the incident constitutes a serious breach and report to research ethics committees as necessary.

### **11.4 STUDY RECORD RETENTION**

All study documentation will be kept for a minimum of 3 years from the protocol defined end of study point. When the minimum retention period has elapsed, study documentation will not be destroyed without permission from the sponsor.

### **11.5 END OF STUDY**

The end of study is defined as the last participant's end of follow-up period – that is up to 12 months from study entry or to withdrawal or death if sooner.

The Investigators or the co-sponsor(s) have the right at any time to terminate the study for clinical or administrative reasons.

The end of the study will be reported to the REC, and R+D Office(s) and co-sponsors within 90 days, or 15 days if the study is terminated prematurely. The Investigators will inform participants of the premature study closure and ensure that the appropriate follow up is arranged for all participants involved. End of study notification will be reported to the co-sponsors via email to [resgov@accord.scot](mailto:resgov@accord.scot).

A summary report of the study will be provided to the REC within 1 year of the end of the study.

### **11.6 INSURANCE AND INDEMNITY**

The co-sponsors are responsible for ensuring proper provision has been made for insurance or indemnity to cover their liability and the liability of the Chief Investigator and staff.

The following arrangements are in place to fulfil the co-sponsors' responsibilities:

- The Protocol has been designed by the Chief Investigator and researchers employed by the University and collaborators. The University has insurance in place (which includes no-fault compensation) for negligent harm caused by poor protocol design by the Chief Investigator and researchers employed by the University.
- Sites participating in the study will be liable for clinical negligence and other negligent harm to individuals taking part in the study and covered by the duty of care owed to them by the sites concerned. The co-sponsors require individual sites participating in the study to arrange for their own insurance or indemnity in respect of these liabilities.
- Sites which are part of the United Kingdom's National Health Service will have the benefit of NHS Indemnity.
- Sites out with the United Kingdom will be responsible for arranging their own indemnity or insurance for their participation in the study, as well as for compliance with local law applicable to their participation in the study.

## **12 REPORTING, PUBLICATIONS AND NOTIFICATION OF RESULTS**

### **12.1 AUTHORSHIP POLICY**

Ownership of the data arising from this study resides with the study team.

## **13 REFERENCES**

- 1.Murtagh FE, Bausewein C, Verne J, Groeneveld EI, Kaloki YE, Higginson IJ. How many people need palliative care? A study developing and comparing methods for population-based estimates. *Palliative Medicine*. 2014;28(1):49-58.
- 2.Kendall M, Carduff E, Lloyd A, Kimbell B, Cavers D, Buckingham S, et al. Different Experiences and Goals in Different Advanced Diseases: Comparing Serial Interviews with Patients with Cancer, Organ Failure or Frailty and Their Family and Professional Carers. *Journal of Pain and Symptom Management*. 2015;50(2):216-24.
- 3.Murray SA, Kendall M, Mitchell G, Moine S, Amblàs-Novellas J, Boyd K. Palliative care from diagnosis to death. *BMJ*. 2017;356.
- 4.Zimmermann C, Swami N, Krzyzanowska M, Leighl N, Rydall A, Rodin G, et al. Perceptions of palliative care among patients with advanced cancer and their caregivers. *Canadian Medical Association Journal*. 2016;188(10).
- 5.Beernaert K, Pardon K, Van den Block L, Devroey D, De Laat M, Geboes K, et al. Palliative care needs at different phases in the illness trajectory: a survey study in patients with cancer. *European Journal of Cancer Care*. 2016;25(4):534-43.
- 6.Caprio AJ. Palliative care: renaming as supportive care and integration into comprehensive cancer care. *Canadian Medical Association Journal*. 2016;188(10):711-2.
- 7.Hui D, Bruera E. Integrating palliative care into the trajectory of cancer care. *Nature Reviews Clinical Oncology*. 2016;13(3):159-71.
- 8.WHA. Strengthening of palliative care as a component of integrated treatment within the continuum of care. 134th Session of the World Health Assembly. EB134.R7 May 2014 [Last accessed 24th May 2017]. Available from: [http://apps.who.int/gb/ebwha/pdf\\_files/WHA67/A67\\_31-en.pdf](http://apps.who.int/gb/ebwha/pdf_files/WHA67/A67_31-en.pdf).
- 9.Kimbell B, Murray SA, Macpherson S, Boyd K. Embracing inherent uncertainty in advanced illness. *BMJ*. 2016;354:i3802.
- 10.Temel J, Greer J, Muzikansky A, Gallagher E, Admane S, Jackson V, et al. Early palliative care for patients with metastatic non-small-cell lung cancer. *N Engl J Med*. 2010;363(8):733 - 42.

11. Tassinari D, Drudi F, Monterubbianesi MC, Stocchi L, Ferioli I, Marzaloni A, et al. Early Palliative Care in Advanced Oncologic and Non-Oncologic Chronic Diseases: A Systematic Review of Literature. *Reviews on Recent Clinical Trials*. 2016;11(1):63-71.
12. Temel JS, Greer JA, El-Jawahri A, Pirl WF, Park ER, Jackson VA, et al. Effects of Early Integrated Palliative Care in Patients With Lung and GI Cancer: A Randomized Clinical Trial. *Journal of Clinical Oncology*. 2016;0(0):JCO.2016.70.5046.
13. Haun MW, Estel S, Rücker G, Friederich H-C, Villalobos M, Thomas M, et al. Early palliative care for adults with advanced cancer. *Cochrane Database of Systematic Reviews*. 2017(6).
14. El Jawahri A, Greer JA, Temel JS. Does palliative care improve outcomes for patients with incurable illness? A review of the evidence. *J Support Oncol*. 2011;9(3):87-94.
15. Gomes B, Calanzani N, Curiale V, McCrone P, Higginson IJ. Effectiveness and cost-effectiveness of home palliative care services for adults with advanced illness and their caregivers. *Cochrane Database of Systematic Reviews*. 2013(6).
16. Higginson IJ, Evans CJ. What is the evidence that palliative care teams improve outcomes for cancer patients and their families? *Cancer J*. 2010;16(5):423-35.
17. Zimmermann C, Riechelmann R, Krzyzanowska M, Rodin G, Tannock I. Effectiveness of specialized palliative care: a systematic review. *JAMA*. 2008;299(14):1698-709.
18. Kamal AH, LeBlanc TW, Meier DE. Better Palliative Care for All: Improving the Lived Experience With Cancer. *JAMA*. 2016;316(1):29-30.
19. Kelley AS, Meier DE. Palliative care--a shifting paradigm. *N Engl J Med*. 2010;363(8):781-2.
20. Schenker Y, Arnold R. The Next Era of Palliative Care. *JAMA*. 2015;314(15):1565-6.
21. Bauman JR, Temel JS. The integration of early palliative care with oncology care: the time has come for a new tradition. *J Natl Compr Canc Netw*. 2014;12(12):1763-71.
22. Greer JA, Jackson VA, Meier DE, Temel JS. Early integration of palliative care services with standard oncology care for patients with advanced cancer. *CA Cancer J Clin*. 2013;63(5):349-63.
23. Hui D, Kim YJ, Park JC, Zhang Y, Strasser F, Cherny N, et al. Integration of oncology and palliative care: a systematic review. *Oncologist*. 2015;20(1):77-83.
24. Parikh RB, Kirch RA, Smith TJ, Temel JS. Early specialty palliative care--translating data in oncology into practice. *N Engl J Med*. 2013;369(24):2347-51.
25. Salins N, Ramanjulu R, Patra L, Deodhar J, Muckaden M. Integration of early specialist palliative care in cancer care and patient related outcomes: A critical review of evidence. *Indian Journal of Palliative Care*. 2016;22(3):252-7.
26. Smith TJ, Temin S, Alesi ER, Abernethy AP, Balboni TA, Basch EM, et al. American Society of Clinical Oncology provisional clinical opinion: the integration of palliative care into standard oncology care. *J Clin Oncol*. 2012;30(8):880-7.
27. Von Roenn JH, Temel J. The integration of palliative care and oncology: the evidence. *Oncology (Williston Park)*. 2011;25(13):1258-60, 62, 64-5.
28. Zhi WI, Smith TJ. Early integration of palliative care into oncology: evidence, challenges and barriers. *Ann Palliat Med*. 2015;4(3):122-31.
29. Gómez-Batiste, X., Murray, S., Thomas, K., Blay, C., Boyd, K., Moine, S., Gignon, M., den Eynden, B. V., Leysen, B., Wens, J., Engels, Y., Dees, M., & Costantini, M. (2017). Comprehensive and integrated palliative care for people with advanced chronic conditions: an update from several European initiatives and recommendations for policy. *Journal of Pain and Symptom Management*, 53(3), 509-517.
30. Campbell M, Fitzpatrick R, Haines A, Kinmonth AL, Sandercock P, Spiegelhalter D, et al. Framework for design and evaluation of complex interventions to improve health. *BMJ*. 2000;321.
31. Lordick F, Mariette C, Haustermans K, Obermannová R, Arnold D. Oesophageal cancer: ESMO Clinical Practice Guidelines for diagnosis, treatment and follow-up†. *Annals of Oncology*. 2016;27(suppl\_5):v50-v7.



- 32.Smyth EC, Verheij M, Allum W, Cunningham D, Cervantes A, Arnold D. Gastric cancer: ESMO Clinical Practice Guidelines for diagnosis, treatment and follow-up†. *Annals of Oncology*. 2016;27(suppl\_5):v38-v49.
33. Farquhar MC, Ewing G, Booth S. Using mixed methods to develop and evaluate complex interventions in palliative care research. *Palliative Medicine*. 2011 December 1, 2011;25(8):748-57.
- 34.Health Improvement Scotland. Anticipatory Care Planning Toolkit: Let's think ahead. Available from: <http://ihub.scot/anticipatory-care-planning-toolkit/>.
- 35.Resuscitation Council (UK). Decisions relating to Cardiopulmonary Resuscitation 2016. Available from: [https://www.resus.org.uk/dnacpr/decisions-relating-to-cpr/?dm\\_i=2GTP,TEHU,4MMYT2,25SPU,1](https://www.resus.org.uk/dnacpr/decisions-relating-to-cpr/?dm_i=2GTP,TEHU,4MMYT2,25SPU,1).
- 36.The Scottish Government. Realising Realistic Medicine: Chief Medical Officer's Annual Report 2015-16. <http://www.gov.scot/Resource/0051/00514513.pdf>.
- 37.Malhotra A, Maughan D, Ansell J, Lehman R, Henderson A, Gray M, et al. Choosing Wisely in the UK: the Academy of Medical Royal Colleges' initiative to reduce the harms of too much medicine. *BMJ*. 2015;350:h2308.
- 38.Macmillan Cancer Support. A Model of Proactive Best Supportive Care for Patients with Lung Cancer: A Service Development led by Fife Specialist Palliative Care. 2016.
- 39 Denvir MA, Cudmore S, Highet G, Robertson S, Donald L, Stephen J, et al. Phase 2 Randomised Controlled Trial and Feasibility Study of Future Care Planning in Patients with Advanced Heart Disease. *Scientific Reports*. 2016;6.
- 40.EQ-5D Health Questionnaire [8th May 2017]. Available from: <http://www.euroqol.org/home.html>.
- 41.ICECAP measures of quality of life and patient capability. Available from: <http://www.birmingham.ac.uk/research/activity/mds/projects/HaPS/HE/ICECAP/index.aspx>.
- 42.Palliative Outcome Scale [8th May 2017]. Available from: <https://pos-pal.org/>.
- 43.COLLABORate Shared decision-making tool . Available from: <http://www.collaboratescore.org/>
- 44.Kendall M, Mason B, Momen N, Barclay S, Munday D, Lovick R, et al. Proactive cancer care in primary care: a mixed-methods study. *Fam Pract*. 2013;30(3):302-12.
- 45.Mason B, Buckingham S, Finucane A, Hutchison P, Kendall M, McCutcheon H, et al. Improving primary palliative care in Scotland: lessons from a mixed methods study. *BMC Family Practice*. 2015;16(1):1-8.
- 46.Mason B, Epiphaniou E, Nanton V, Donaldson A, Shipman C, Daveson BA, et al. Coordination of care for individuals with advanced progressive conditions: a multi-site ethnographic and serial interview study. *British Journal of General Practice*. 2013;63(613):e580-e8.
- 47.Tapsfield J, Hall C, Lunan C, McCutcheon H, McLoughlin P, Rhee J, et al. Many people in Scotland now benefit from anticipatory care before they die: an after death analysis and interviews with general practitioners. *BMJ Supportive & Palliative Care*. 2016;0:1-10.

## Supplementary Appendix S2: Statistical analysis plan

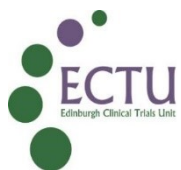

Early support in primary care for people starting treatment for cancer:  
GI-ACP

|                         |                           |
|-------------------------|---------------------------|
| <b>Version No</b>       | 1.0                       |
| <b>Date Finalised</b>   | 19 <sup>th</sup> Feb 2020 |
| <b>Author(s)</b>        | Jacqueline Stephen        |
| <b>CI Name</b>          | Dr Kirsty Boyd            |
| <b>CI Email address</b> | Kirsty.Boyd@ed.ac.uk      |

| Signatures                                          |                                           |
|-----------------------------------------------------|-------------------------------------------|
| <b>Trial Statistician:</b><br>Dr Jacqueline Stephen | <b>Date:</b><br>20 <sup>th</sup> Feb 2020 |
| <b>Chief Investigator:</b><br>Dr Kirsty Boyd        | <b>Date:</b><br>20 <sup>th</sup> Feb 2020 |

| Document Control |                            |                      |
|------------------|----------------------------|----------------------|
| Version No       | Date                       | Summary of Revisions |
| 1.0              | 26 <sup>th</sup> June 2019 | Initial Creation     |
|                  |                            |                      |
|                  |                            |                      |
|                  |                            |                      |

## Table of Contents

|                                                               |          |
|---------------------------------------------------------------|----------|
| <b>List of Abbreviations .....</b>                            | <b>2</b> |
| <b>1. Introduction .....</b>                                  | <b>3</b> |
| <b>2. Statistical Methods section from the protocol .....</b> | <b>3</b> |
| <b>3. Overall Statistical Principles .....</b>                | <b>4</b> |
| <b>4. List of Analyses .....</b>                              | <b>4</b> |
| 4.1 Participant Flow.....                                     | 4        |
| 4.2 Baseline characteristics.....                             | 4        |

|                               |   |
|-------------------------------|---|
| 4.3 Feasibility outcomes..... | 5 |
| 4.3 Clinical outcomes .....   | 5 |
| 5. Validation and QC .....    | 5 |
| 6. References.....            | 6 |

## List of Abbreviations

| Abbreviation | Full name                          |
|--------------|------------------------------------|
| ACP          | Anticipatory care planning         |
| CI           | Confidence interval                |
| ECTU         | Edinburgh Clinical Trials Unit     |
| GI           | Gastrointestinal                   |
| ITT          | Intention to treat                 |
| IQR          | Inter-quartile range               |
| KIS          | Key information summary            |
| MDT          | Multidisciplinary team             |
| SOP          | Standard operating procedure       |
| SPCC         | Specialist palliative care contact |
| VAS          | Visual analogue scale              |
|              |                                    |
|              |                                    |

## **1. Introduction**

This document details the criteria to be used for the definition of the analysis populations and the statistical methodology for analysis of the GI-ACP trial, a feasibility randomised controlled trial of a care planning intervention involving patients starting palliative oncology treatment in a Scottish regional cancer centre.

The aim of the trial is to randomise 50 patients using a secure web-based randomisation system stratified by diagnostic group and health board with 1:1 allocation to either intervention: Early Contact or control: Standard care, to determine the feasibility and acceptability to patients and carers of a person-centred, care planning intervention.

This document has been compiled according to the Edinburgh Clinical Trials Unit (ECTU) standard operating procedure (SOP) “Statistical Analysis Plans v4.0” and has been written based on information contained in the study protocol version 2.0, dated 5th July 2019. Analysis of the qualitative data from the trial is not within the scope of this analysis plan and will be handled separately.

The results will be submitted for publication and reported according to the CONSORT 2010 extension to randomised pilot and feasibility trials (Eldridge et al., 2016).

## **2. Statistical Methods section from the protocol**

Analysis of the quantitative data will largely consist of descriptive statistics and comparison between the intervention and control groups.

Throughout, continuous variables will be summarised by treatment group and overall using the mean, standard deviation, median, lower quartile, upper quartile, minimum and maximum values. Categorical variables will be reported by treatment group and overall using the frequency and percentage for each category.

Baseline demographic and clinical data will be summarised by treatment arm and overall. Each of the primary feasibility outcomes (proportion of eligible patients willing to consent and be randomised; proportion of patients randomised to the intervention arm who do make an appointment with their GP to discuss their ongoing care and support needs) will be analysed by calculating the proportion and its exact binomial 95% confidence interval.

The proportion of participants in each treatment arm retained in the study through all follow-up time points will be analysed in the same manner. Furthermore, the difference in retention proportions between treatment arms will be calculated, along with its 95% confidence interval calculated using the normal approximation to the binomial distribution.

Clinical outcomes EQ-5D-5L, ICE-CAP and CollaboRATE will be summarised by treatment arm and overall.

As this is a feasibility study, there will be no imputation of missing data; the missing data rates will be reported by treatment group to inform on trial feasibility. Descriptive summaries of the baseline demographic and clinical data and primary and secondary outcomes will also be provided for the subgroups defined by the randomisation strata: diagnostic group (gastrointestinal or pancreatic) and

Health Board. The intention to treat principle will be followed in all analyses. There are no formal interim analyses planned.

### **3. Overall Statistical Principles**

All analyses will follow the intention to treat (ITT) principle. The ITT analysis population will include all patients who have been randomised into the GI-ACP study. Patients will be analysed in the group to which they were randomised, regardless of intervention received.

In general terms, categorical data will be presented using counts and percentages, whilst continuous variables will be presented using the mean, median, standard deviation (SD), minimum, maximum, inter quartile range (IQR) and number of patients with an observation (n).

Where there is missing data for a variable, those records will be removed from any statistical analysis relating to that variable, unless otherwise specified. There will be no imputation of missing data.

There will be no formal statistical hypothesis tests. 95% (2-sided) confidence intervals (CIs) will be presented where specified.

Distributional assumptions underlying the statistical analyses will be assessed by visual inspection of residual plots. Normality will be examined by normal probability plots. If the distributional assumptions for the parametric approach are not satisfied, further data transformation (to alleviate substantial skewness (i.e. normalizing) or to stabilise the variance), or other suitable methods will be considered. This will be documented in the statistical results report together with the reasoning supporting the action taken, if applicable.

All analyses and data manipulations will be carried out using SAS software, Version 9.4 or later. Copyright (c) 2002-2012 by SAS Institute Inc., Cary, NC, USA.

## **4. List of Analyses**

### **4.1 Participant Flow**

Participant recruitment and retention will be reported as recommended by CONSORT 2010 extension to randomised pilot and feasibility trials (Eldridge et al., 2016). This will include the number (1) screened, (2) eligible, and (3) randomly assigned. Losses, exclusions and withdrawals after randomisation will be described, together with reasons.

### **4.2 Baseline characteristics**

Baseline characteristics of patients will be summarised using descriptive statistics for (1) eligible but not randomised versus eligible and randomised, (2) randomised group (early contact or standard care), (3) diagnostic group (gastrointestinal or pancreatic), and (4) health board.

### **4.3 Feasibility outcomes**

Feasibility outcomes (proportion of eligible patients who were randomised; proportion of patients randomised to the intervention arm who received at least one anticipatory care planning review at their GP practice documented in a new or updated key information summary (KIS); had at least one care planning review by GP, by phone or face to face; a clear ACP in those with a KIS) will be analysed by calculating the proportion and its exact binomial 95% confidence interval.

The proportion of participants in each treatment arm who are still alive and retained in the study through all follow-up time points will be analysed in the same manner. Furthermore, the difference in retention proportions between treatment arms will be calculated, along with its 95% confidence interval calculated using the normal approximation to the binomial distribution.

The number of deaths in the study through all follow-up time points will be reported descriptively.

The feasibility outcomes will also be presented by stratification factors: diagnostic group and health board.

### **4.3 Clinical outcomes**

Clinical outcomes EQ-5D-5L, ICECAP and CollaboRATE will be summarised using descriptive statistics by randomised group and overall at each time point (baseline, 6,12, 24 and 48 weeks after recruitment).

The EQ-5D-5L summary will include the health index (5 health states converted into single index value) and the visual analogue scale (VAS).

The 7 ICECAP questions will be converted into a single score using the simple tariff values without interactions published by Huynh et al (Huynh et al., 2017).

The CollaboRATE summary will present both scoring methods (CollaboRATE mean and CollaboRATE top score). For CollaboRATE mean, participant's scores on the 3 items are summed and multiplied by 3.704, transforming to a scale from 0 to 100. For CollaboRATE top score, participants will be coded as 1 (yes) when they recorded the highest response on the scale for all 3 items and as 0 (no) in all other situations.

Service use data (total hospital admissions, total bed days, total GP/practice contacts, total oncology clinic treatments, specialist palliative care contact (SPCC)), the number, place and cause of death will also be summarised by randomised group using descriptive statistics.

The following time-to-event outcomes will be reported by randomised group using descriptive statistics: multidisciplinary team (MDT) review meeting to first GP contact; last GP contact to death; last oncology treatment to death; MDT review meeting to death; MDT review meeting to updated KIS; MDT review meeting to first SPCC; last SPCC to death.

## **5. Validation and QC**

The statistical report will be read and sense-checked by a second statistician.

The derivation of the clinical trial outcomes (EuroQol EQ-5D-5L, CollaboRATE scores and the ICECAP Supportive Care Measure) will be validated by a second statistician.

## 6. References

- ELDRIDGE, S. M., CHAN, C. L., CAMPBELL, M. J., BOND, C. M., HOPEWELL, S., THABANE, L. & LANCASTER, G. A. 2016. CONSORT 2010 statement: extension to randomised pilot and feasibility trials. *Bmj*, 355, i5239.
- HUYNH, E., COAST, J., ROSE, J., KINGHORN, P. & FLYNN, T. 2017. Values for the ICECAP-Supportive Care Measure (ICECAP-SCM) for use in economic evaluation at end of life. *Social Science & Medicine*, 189, 114-128.

# CONFIDENTIAL

**Supplementary Appendix S3: Final statistical analysis report**

Early support in primary care for people starting  
treatment for cancer

## **GI-ACP Final Analysis Report**

**Version Number 1.0 : 25NOV2020: Author JS**

---

**Dataset analysed as it was on: 30.10.2020**

---



**S3.1:****1. Trial Recruitment****Table 1.1 Summary of Screening Data.**

|                                             | N (%)    |  |
|---------------------------------------------|----------|--|
| Screened                                    | 269      |  |
| -----                                       |          |  |
| Excluded at MDT screening                   | 99 (37%) |  |
| Unfit for oncology treatment                | 86 (87%) |  |
| Patient chose supportive/palliative care    | 13 (13%) |  |
| Excluded at clinic screening                | 71 (26%) |  |
| Unfit for oncology treatment                | 34 (48%) |  |
| Chose palliative care                       | 28 (39%) |  |
| On other study                              | 6 (8%)   |  |
| Not eligible                                | 3 (4%)   |  |
| Eligible                                    | 99 (37%) |  |
| -----                                       |          |  |
| Not randomised                              | 53 (54%) |  |
| Not discussed                               | 36 (68%) |  |
| Other                                       | 8 (15%)  |  |
| Unknown                                     | 5 (9%)   |  |
| Declined offer                              | 4 (8%)   |  |
| Randomised                                  | 46 (46%) |  |
| -----                                       |          |  |
| Withdrawals                                 | 10 (22%) |  |
| Too unwell                                  | 4 (40%)  |  |
| Participant chose not to engage             | 3 (30%)  |  |
| Opt out                                     | 2 (20%)  |  |
| Alcohol issues prevented engagement         | 1 (10%)  |  |
| (Withdraw followed by death)                | 8 (80%)  |  |
| Deaths                                      | 21 (46%) |  |
| -----                                       |          |  |
| Numbers are n (%).                          |          |  |
| Abbreviations: MDT = multidisciplinary team |          |  |

**S3.2:****2. Baseline Characteristics****Table 2.1: Summary of baseline characteristics for all screened patients - not eligible, eligible and not randomised, and randomised.**

|                                                           | <i>All N=269</i> | <i>Not eligible N=170</i> | <i>Eligible but not randomised N=53</i> | <i>Randomised N=46</i> |
|-----------------------------------------------------------|------------------|---------------------------|-----------------------------------------|------------------------|
| <b>Age</b>                                                |                  |                           |                                         |                        |
| N                                                         | 269              | 170                       | 53                                      | 46                     |
| Mean (SD)                                                 | 71 (11)          | 74 (11)                   | 68 (10)                                 | 65 (9)                 |
| Median [Q1-Q3]                                            | 72 [64-79]       | 76 [68-83]                | 68 [62-74]                              | 65 [59-71]             |
| Min, Max                                                  | 42,98            | 42,98                     | 45,92                                   | 45,80                  |
| <b>Gender</b>                                             |                  |                           |                                         |                        |
| Female                                                    | 94 (35%)         | 57 (34%)                  | 22 (42%)                                | 15 (33%)               |
| Male                                                      | 175 (65%)        | 113 (66%)                 | 31 (58%)                                | 31 (67%)               |
| <b>Cancer Diagnosis</b>                                   |                  |                           |                                         |                        |
| Oesophagus/ Junctional                                    | 119 (44%)        | 68 (40%)                  | 24 (45%)                                | 27 (59%)               |
| Pancreas                                                  | 106 (39%)        | 70 (41%)                  | 24 (45%)                                | 12 (26%)               |
| Stomach                                                   | 44 (16%)         | 32 (19%)                  | 5 (9%)                                  | 7 (15%)                |
| <b>First Diagnosis</b>                                    |                  |                           |                                         |                        |
| No - relapsed disease                                     | 8 (3%)           | 4 (2%)                    | 3 (6%)                                  | 1 (2%)                 |
| Yes                                                       | 261 (97%)        | 166 (98%)                 | 50 (94%)                                | 45 (98%)               |
| <b>Disease Extent - Locally Advanced Only</b>             |                  |                           |                                         |                        |
| No                                                        | 169 (63%)        | 100 (59%)                 | 35 (66%)                                | 34 (74%)               |
| Yes                                                       | 100 (37%)        | 70 (41%)                  | 18 (34%)                                | 12 (26%)               |
| <b>Disease Extent - Metastatic</b>                        |                  |                           |                                         |                        |
| No                                                        | 100 (37%)        | 70 (41%)                  | 18 (34%)                                | 12 (26%)               |
| Yes                                                       | 169 (63%)        | 100 (59%)                 | 35 (66%)                                | 34 (74%)               |
| <b>Surgical Treatment - Surgery</b>                       |                  |                           |                                         |                        |
| No                                                        | 40 (74%)         | 0 (0%)                    | 0 (0%)                                  | 40 (89%)               |
| Yes                                                       | 14 (26%)         | 6 (100%)                  | 3 (100%)                                | 5 (11%)                |
| Missing                                                   | 215 ( )          | 164 ( )                   | 50 ( )                                  | 1 ( )                  |
| <b>Surgery Type</b>                                       |                  |                           |                                         |                        |
| Bypass surgery                                            | 3 (25%)          | 1 (20%)                   | 0 (0%)                                  | 2 (50%)                |
| Gastrectomy                                               | 1 (8%)           | 0 (0%)                    | 0 (0%)                                  | 1 (25%)                |
| Oesophagectomy                                            | 3 (25%)          | 2 (40%)                   | 1 (33%)                                 | 0 (0%)                 |
| Whipples'                                                 | 5 (42%)          | 2 (40%)                   | 2 (67%)                                 | 1 (25%)                |
| Missing                                                   | 2 ( )            | 1 ( )                     | 0 ( )                                   | 1 ( )                  |
| <b>Initial Oncology Treatment Plan made at MDT review</b> |                  |                           |                                         |                        |

**S3.2 continued:****2. Baseline Characteristics****Table 2.1: Summary of baseline characteristics for all screened patients - not eligible, eligible and not randomised, and randomised.**

|                           | <b><i>All N=269</i></b> | <b><i>Not eligible N=170</i></b> | <b><i>Eligible but not<br/>randomised N=53</i></b> | <b><i>Randomised N=46</i></b> |
|---------------------------|-------------------------|----------------------------------|----------------------------------------------------|-------------------------------|
| Chemotherapy              | 156 (58%)               | 68 (40%)                         | 44 (83%)                                           | 44 (96%)                      |
| Other                     | 101 (38%)               | 100 (59%)                        | 1 (2%)                                             | 0 (0%)                        |
| Radiotherapy              | 12 (4%)                 | 2 (1%)                           | 8 (15%)                                            | 2 (4%)                        |
| <b>Main Disease Group</b> |                         |                                  |                                                    |                               |
| Pancreas                  | 106 (39%)               | 70 (41%)                         | 24 (45%)                                           | 12 (26%)                      |
| Upper GI                  | 163 (61%)               | 100 (59%)                        | 29 (55%)                                           | 34 (74%)                      |

Numbers are n (%) or n, mean (SD), median (Q1, Q3).

Abbreviations: GI, gastrointestinal; MDT, multidisciplinary team; N, number; Q, quartile; SD, standard deviation.

**S3.3:****2. Baseline Characteristics****Table 2.2: Summary of baseline characteristics by randomised group.**

|                                               | <i>All N=46</i> | <i>Intervention N=25</i> | <i>Control N=21</i> |
|-----------------------------------------------|-----------------|--------------------------|---------------------|
| <b>Age</b>                                    |                 |                          |                     |
| N                                             | 46              | 25                       | 21                  |
| Mean (SD)                                     | 65 (9)          | 65 (9)                   | 64 (8)              |
| Median [Q1-Q3]                                | 65 [59-71]      | 66 [61-71]               | 64 [58-71]          |
| Min, Max                                      | 45,80           | 45,80                    | 46,79               |
| <b>Gender</b>                                 |                 |                          |                     |
| Female                                        | 15 (33%)        | 8 (32%)                  | 7 (33%)             |
| Male                                          | 31 (67%)        | 17 (68%)                 | 14 (67%)            |
| <b>Cancer Diagnosis</b>                       |                 |                          |                     |
| Oesophagus/ Junctional                        | 27 (59%)        | 15 (60%)                 | 12 (57%)            |
| Pancreas                                      | 12 (26%)        | 7 (28%)                  | 5 (24%)             |
| Stomach                                       | 7 (15%)         | 3 (12%)                  | 4 (19%)             |
| <b>First Diagnosis</b>                        |                 |                          |                     |
| No - relapsed disease                         | 1 (2%)          | 1 (4%)                   | 0 (0%)              |
| Yes                                           | 45 (98%)        | 24 (96%)                 | 21 (100%)           |
| <b>Disease Extent - Locally Advanced Only</b> |                 |                          |                     |
| No                                            | 34 (74%)        | 19 (76%)                 | 15 (71%)            |
| Yes                                           | 12 (26%)        | 6 (24%)                  | 6 (29%)             |
| <b>Disease Extent - Metastatic</b>            |                 |                          |                     |
| No                                            | 12 (26%)        | 6 (24%)                  | 6 (29%)             |
| Yes                                           | 34 (74%)        | 19 (76%)                 | 15 (71%)            |
| <b>Surgical Treatment - Stented</b>           |                 |                          |                     |
| No                                            | 38 (83%)        | 21 (84%)                 | 17 (81%)            |
| Yes                                           | 8 (17%)         | 4 (16%)                  | 4 (19%)             |
| <b>Surgical Treatment - Surgery</b>           |                 |                          |                     |
| No                                            | 40 (89%)        | 22 (92%)                 | 18 (86%)            |
| Yes                                           | 5 (11%)         | 2 (8%)                   | 3 (14%)             |
| Missing                                       | 1 ( )           | 1 ( )                    | 0 ( )               |
| <b>Surgery Type</b>                           |                 |                          |                     |
| Bypass surgery                                | 2 (50%)         | 1 (50%)                  | 1 (50%)             |
| Gastrectomy                                   | 1 (25%)         | 1 (50%)                  | 0 (0%)              |
| Whipples'                                     | 1 (25%)         | 0 (0%)                   | 1 (50%)             |
| Missing                                       | 1 ( )           | 0 ( )                    | 1 ( )               |

**S3.3 continued:****2. Baseline Characteristics****Table 2.2: Summary of baseline characteristics by randomised group.**

|                                                           | <i>All N=46</i> | <i>Intervention N=25</i> | <i>Control N=21</i> |
|-----------------------------------------------------------|-----------------|--------------------------|---------------------|
| <b>Initial Oncology Treatment Plan made at MDT review</b> |                 |                          |                     |
| Chemotherapy                                              | 44 (96%)        | 23 (92%)                 | 21 (100%)           |
| Radiotherapy                                              | 2 (4%)          | 2 (8%)                   | 0 (0%)              |
| <b>Main Disease Group</b>                                 |                 |                          |                     |
| Pancreas                                                  | 12 (26%)        | 7 (28%)                  | 5 (24%)             |
| Upper GI                                                  | 34 (74%)        | 18 (72%)                 | 16 (76%)            |
| <b>Social Support</b>                                     |                 |                          |                     |
| Lives alone                                               | 10 (22%)        | 3 (12%)                  | 7 (33%)             |
| Lives with other                                          | 3 (7%)          | 1 (4%)                   | 2 (10%)             |
| Lives with partner                                        | 33 (72%)        | 21 (84%)                 | 12 (57%)            |
| <b>Comorbidities</b>                                      |                 |                          |                     |
| Diabetes                                                  | 5 (26%)         | 3 (27%)                  | 2 (25%)             |
| None                                                      | 2 (11%)         | 1 (9%)                   | 1 (13%)             |
| Other                                                     | 12 (63%)        | 7 (64%)                  | 5 (63%)             |
| Missing                                                   | 27 ( )          | 14 ( )                   | 13 ( )              |
| <b>Agreed Oncology Treatment Plan</b>                     |                 |                          |                     |
| Chemotherapy                                              | 43 (93%)        | 22 (88%)                 | 21 (100%)           |
| Radiotherapy                                              | 3 (7%)          | 3 (12%)                  | 0 (0%)              |

Numbers are n (%) or n, mean (SD), median (Q1, Q3).

Abbreviations: GI, gastrointestinal; MDT, multidisciplinary team; N, number; Q, quartile; SD, standard deviation.

**S3.4:****2. Baseline Characteristics****Table 2.3: Summary of baseline characteristics by stratification factors.**

|                                               | <i>Disease Group</i> |                      |                      | <i>Health Board</i> |                  |
|-----------------------------------------------|----------------------|----------------------|----------------------|---------------------|------------------|
|                                               | <i>All N=46</i>      | <i>Pancreas N=12</i> | <i>Upper GI N=34</i> | <i>Lothian N=29</i> | <i>Fife N=17</i> |
| <b>Age</b>                                    |                      |                      |                      |                     |                  |
| N                                             | 46                   | 12                   | 34                   | 29                  | 17               |
| Mean (SD)                                     | 65 (9)               | 65 (9)               | 65 (9)               | 64 (9)              | 66 (9)           |
| Median [Q1-Q3]                                | 65 [59-71]           | 67 [59-72]           | 64 [60-71]           | 64 [59-71]          | 67 [62-71]       |
| Min, Max                                      | 45,80                | 45,75                | 46,80                | 46,80               | 45,79            |
| <b>Gender</b>                                 |                      |                      |                      |                     |                  |
| Female                                        | 15 (33%)             | 7 (58%)              | 8 (24%)              | 9 (31%)             | 6 (35%)          |
| Male                                          | 31 (67%)             | 5 (42%)              | 26 (76%)             | 20 (69%)            | 11 (65%)         |
| <b>Cancer Diagnosis</b>                       |                      |                      |                      |                     |                  |
| Oesophagus/ Junctional                        | 27 (59%)             | 0 (0%)               | 27 (79%)             | 18 (62%)            | 9 (53%)          |
| Pancreas                                      | 12 (26%)             | 12 (100%)            | 0 (0%)               | 8 (28%)             | 4 (24%)          |
| Stomach                                       | 7 (15%)              | 0 (0%)               | 7 (21%)              | 3 (10%)             | 4 (24%)          |
| <b>First Diagnosis</b>                        |                      |                      |                      |                     |                  |
| No - relapsed disease                         | 1 (2%)               | 0 (0%)               | 1 (3%)               | 1 (3%)              | 0 (0%)           |
| Yes                                           | 45 (98%)             | 12 (100%)            | 33 (97%)             | 28 (97%)            | 17 (100%)        |
| <b>Disease Extent - Locally Advanced Only</b> |                      |                      |                      |                     |                  |
| No                                            | 34 (74%)             | 8 (67%)              | 26 (76%)             | 18 (62%)            | 16 (94%)         |
| Yes                                           | 12 (26%)             | 4 (33%)              | 8 (24%)              | 11 (38%)            | 1 (6%)           |
| <b>Disease Extent - Metastatic</b>            |                      |                      |                      |                     |                  |
| No                                            | 12 (26%)             | 4 (33%)              | 8 (24%)              | 11 (38%)            | 1 (6%)           |
| Yes                                           | 34 (74%)             | 8 (67%)              | 26 (76%)             | 18 (62%)            | 16 (94%)         |
| <b>Surgical Treatment - Stented</b>           |                      |                      |                      |                     |                  |
| No                                            | 38 (83%)             | 8 (67%)              | 30 (88%)             | 24 (83%)            | 14 (82%)         |
| Yes                                           | 8 (17%)              | 4 (33%)              | 4 (12%)              | 5 (17%)             | 3 (18%)          |
| <b>Surgical Treatment - Surgery</b>           |                      |                      |                      |                     |                  |
| No                                            | 40 (89%)             | 8 (73%)              | 32 (94%)             | 24 (83%)            | 16 (100%)        |
| Yes                                           | 5 (11%)              | 3 (27%)              | 2 (6%)               | 5 (17%)             | 0 (0%)           |
| Missing                                       | 1 ( )                | 1 ( )                | 0 ( )                | 0 ( )               | 1 ( )            |
| <b>Surgery Type</b>                           |                      |                      |                      |                     |                  |
| Bypass surgery                                | 2 (50%)              | 2 (67%)              | 0 (0%)               | 2 (50%)             | 0 (0%)           |
| Gastrectomy                                   | 1 (25%)              | 0 (0%)               | 1 (100%)             | 1 (25%)             | 0 (0%)           |
| Whipples'                                     | 1 (25%)              | 1 (33%)              | 0 (0%)               | 1 (25%)             | 0 (0%)           |

**S3.4 continued:****2. Baseline Characteristics****Table 2.3: Summary of baseline characteristics by stratification factors.**

|                                                                                                                                                                             | <i>Disease Group</i> |                      |                      | <i>Health Board</i> |                  |
|-----------------------------------------------------------------------------------------------------------------------------------------------------------------------------|----------------------|----------------------|----------------------|---------------------|------------------|
|                                                                                                                                                                             | <i>All N=46</i>      | <i>Pancreas N=12</i> | <i>Upper GI N=34</i> | <i>Lothian N=29</i> | <i>Fife N=17</i> |
| Missing                                                                                                                                                                     | 1 ( )                | 0 ( )                | 1 ( )                | 1 ( )               | 0 ( )            |
| <b>Initial Oncology Treatment Plan made at MDT review</b>                                                                                                                   |                      |                      |                      |                     |                  |
| Chemotherapy                                                                                                                                                                | 44 (96%)             | 12 (100%)            | 32 (94%)             | 27 (93%)            | 17 (100%)        |
| Radiotherapy                                                                                                                                                                | 2 (4%)               | 0 (0%)               | 2 (6%)               | 2 (7%)              | 0 (0%)           |
| <b>Main Disease Group</b>                                                                                                                                                   |                      |                      |                      |                     |                  |
| Pancreas                                                                                                                                                                    | 12 (26%)             | 12 (100%)            | 0 (0%)               | 8 (28%)             | 4 (24%)          |
| Upper GI                                                                                                                                                                    | 34 (74%)             | 0 (0%)               | 34 (100%)            | 21 (72%)            | 13 (76%)         |
| <b>Social Support</b>                                                                                                                                                       |                      |                      |                      |                     |                  |
| Lives alone                                                                                                                                                                 | 10 (22%)             | 2 (17%)              | 8 (24%)              | 8 (28%)             | 2 (12%)          |
| Lives with other                                                                                                                                                            | 3 (7%)               | 1 (8%)               | 2 (6%)               | 2 (7%)              | 1 (6%)           |
| Lives with partner                                                                                                                                                          | 33 (72%)             | 9 (75%)              | 24 (71%)             | 19 (66%)            | 14 (82%)         |
| <b>Comorbidities</b>                                                                                                                                                        |                      |                      |                      |                     |                  |
| Diabetes                                                                                                                                                                    | 5 (26%)              | 2 (29%)              | 3 (25%)              | 3 (25%)             | 2 (29%)          |
| None                                                                                                                                                                        | 2 (11%)              | 1 (14%)              | 1 (8%)               | 1 (8%)              | 1 (14%)          |
| Other                                                                                                                                                                       | 12 (63%)             | 4 (57%)              | 8 (67%)              | 8 (67%)             | 4 (57%)          |
| Missing                                                                                                                                                                     | 27 ( )               | 5 ( )                | 22 ( )               | 17 ( )              | 10 ( )           |
| <b>Agreed Oncology Treatment Plan</b>                                                                                                                                       |                      |                      |                      |                     |                  |
| Chemotherapy                                                                                                                                                                | 43 (93%)             | 12 (100%)            | 31 (91%)             | 26 (90%)            | 17 (100%)        |
| Radiotherapy                                                                                                                                                                | 3 (7%)               | 0 (0%)               | 3 (9%)               | 3 (10%)             | 0 (0%)           |
| Numbers are n (%) or n, mean (SD), median (Q1, Q3).<br>Abbreviations: GI, gastrointestinal; MDT, multidisciplinary team;<br>N, number; Q, quartile; SD, standard deviation. |                      |                      |                      |                     |                  |

**S3.5:****3. Feasibility Outcomes****Table 3.1. Deaths and study retention**

|                                | <b>All N=46</b> |              | <b>Intervention N=25</b> |              | <b>Control N=21</b> |              |                            |
|--------------------------------|-----------------|--------------|--------------------------|--------------|---------------------|--------------|----------------------------|
|                                | <b>N</b>        | <b>n (%)</b> | <b>N</b>                 | <b>n (%)</b> | <b>N</b>            | <b>n (%)</b> | <b>Difference (95% CI)</b> |
| <b>Deaths*</b>                 |                 |              |                          |              |                     |              |                            |
| Week 6                         | 46              | 2 (4%)       | 25                       | 1 (4%)       | 21                  | 1 (5%)       | -                          |
| Week 12                        | 46              | 6 (13%)      | 25                       | 3 (12%)      | 21                  | 3 (14%)      | -                          |
| Week 24                        | 46              | 14 (30%)     | 25                       | 7 (28%)      | 21                  | 7 (33%)      | -                          |
| Week 48                        | 25              | 16 (64%)     | 12                       | 7 (58%)      | 13                  | 9 (69%)      | -                          |
| <b>Retained in the study**</b> |                 |              |                          |              |                     |              |                            |
| Week 6                         | 44              | 28 (64%)     | 24                       | 16 (67%)     | 20                  | 12 (60%)     | 6.7% (-21.9% to 35.2%)     |
| Week 12                        | 40              | 25 (63%)     | 22                       | 13 (59%)     | 18                  | 12 (67%)     | -7.6% (-37.5% to 22.4%)    |
| Week 24                        | 32              | 21 (66%)     | 18                       | 9 (50%)      | 14                  | 12 (86%)     | -35.7% (-65.2% to -6.2%)   |
| Week 48                        | 9               | 6 (67%)      | 5                        | 4 (80%)      | 4                   | 2 (50%)      | 30.0% (-30.3% to 90.3%)    |

\*Cumulative number of deaths at each time point.

\*\*Defined as those who returned a questionnaire at the respective time period. The Denominator (N) includes only those who were alive.

Note. Week 48 represents a subset of the participants who were randomised and due their follow-up prior to the study end (31 Aug 2020).

Difference is for Intervention minus Control.

Abbreviations: CI, confidence interval; N, number.



**S3.6:****3. Feasibility Outcomes****Table 3.2. Deaths and study retention by Stratification Factors**

|                                | <i>Disease Group</i> |              |                 |              | <i>Health Board</i> |              |             |              |
|--------------------------------|----------------------|--------------|-----------------|--------------|---------------------|--------------|-------------|--------------|
|                                | <i>Pancreas</i>      |              | <i>Upper GI</i> |              | <i>Lothian</i>      |              | <i>Fife</i> |              |
|                                | <i>N</i>             | <i>n (%)</i> | <i>N</i>        | <i>n (%)</i> | <i>N</i>            | <i>n (%)</i> | <i>N</i>    | <i>n (%)</i> |
| <b>Deaths*</b>                 |                      |              |                 |              |                     |              |             |              |
| Week 6                         | 12                   | 0 (0%)       | 34              | 2 (6%)       | 29                  | 1 (3%)       | 17          | 1 (6%)       |
| Week 12                        | 12                   | 2 (17%)      | 34              | 4 (12%)      | 29                  | 3 (10%)      | 17          | 3 (18%)      |
| Week 24                        | 12                   | 6 (50%)      | 34              | 8 (24%)      | 29                  | 8 (28%)      | 17          | 6 (35%)      |
| Week 48                        | 7                    | 7 (100%)     | 18              | 9 (50%)      | 15                  | 10 (67%)     | 10          | 6 (60%)      |
| <b>Retained in the study**</b> |                      |              |                 |              |                     |              |             |              |
| Week 6                         | 12                   | 6 (50%)      | 32              | 22 (69%)     | 28                  | 17 (61%)     | 16          | 11 (69%)     |
| Week 12                        | 10                   | 5 (50%)      | 30              | 20 (67%)     | 26                  | 15 (58%)     | 14          | 10 (71%)     |
| Week 24                        | 6                    | 3 (50%)      | 26              | 18 (69%)     | 21                  | 14 (67%)     | 11          | 7 (64%)      |
| Week 48                        | 0                    | 0 (0%)       | 9               | 6 (67%)      | 5                   | 4 (80%)      | 4           | 2 (50%)      |

\*Cumulative number of deaths at each time point.

\*\*Defined as those who returned a questionnaire at the respective time period. The Denominator (N) includes only those who were alive.

Note. Week 48 represents a subset of the participants who were randomised and due their follow-up prior to the study end (31 Aug 2020).

Abbreviations: GI, gastrointestinal; N, number.

**S3.7:****3. Feasibility Outcomes****Table 3.3. Feasibility Outcomes**

|                                                  |         | <i>All N=46</i> |              |                  | <i>Intervention N=25</i> |              |                  | <i>Control N=21</i> |              |                  |
|--------------------------------------------------|---------|-----------------|--------------|------------------|--------------------------|--------------|------------------|---------------------|--------------|------------------|
|                                                  |         | <i>N</i>        | <i>n (%)</i> | <i>95% CI</i>    | <i>N</i>                 | <i>n (%)</i> | <i>95% CI</i>    | <i>N</i>            | <i>n (%)</i> | <i>95% CI</i>    |
| <b>Feasibility</b>                               |         |                 |              |                  |                          |              |                  |                     |              |                  |
| Eligible patients who were randomised            |         | 99              | 46 (46%)     | (36.4% to 56.8%) | -                        | -            | -                | -                   | -            | -                |
| New or updated KIS                               |         | 44              | 37 (84%)     | (69.9% to 93.4%) | 24                       | 20 (83%)     | (62.6% to 95.3%) | 20                  | 17 (85%)     | (62.1% to 96.8%) |
| KIS Quality                                      | Low     |                 | 17 (47%)     |                  |                          | 12 (60%)     |                  |                     | 5 (31%)      |                  |
|                                                  | Med     |                 | 12 (33%)     |                  |                          | 6 (30%)      |                  |                     | 6 (38%)      |                  |
|                                                  | High    |                 | 7 (19%)      |                  |                          | 2 (10%)      |                  |                     | 5 (31%)      |                  |
|                                                  | Missing |                 | 1 ()         |                  |                          | 0 ()         |                  |                     | 1 ()         |                  |
| Clear ACP in those with a KIS                    |         | 37              | 19 (51%)     | (34.4% to 68.1%) | 20                       | 9 (45%)      | (23.1% to 68.5%) | 17                  | 10 (59%)     | (32.9% to 81.6%) |
| Letter helped get an appointment to see your GP* |         | -               | -            | -                | 17                       | 11 (65%)     | (38.3% to 85.8%) | -                   | -            | -                |

\*Included in denominator if participants had provided any response (yes/no) to the question at either the 6 or 12 week questionnaire follow-up.

Abbreviations: ACP, Anticipatory care planning; CI, confidence interval

KIS, Key information summary; N, number; -, not applicable.

**S3.8:****3. Feasibility Outcomes****Table 3.4. Feasibility Outcomes by Stratification Factors**

|                                                  |         | <b>Disease Group</b> |              |                 |              | <b>Health Board</b> |              |             |              |
|--------------------------------------------------|---------|----------------------|--------------|-----------------|--------------|---------------------|--------------|-------------|--------------|
|                                                  |         | <b>Pancreas</b>      |              | <b>Upper GI</b> |              | <b>Lothian</b>      |              | <b>Fife</b> |              |
|                                                  |         | <b>N</b>             | <b>n (%)</b> | <b>N</b>        | <b>n (%)</b> | <b>N</b>            | <b>n (%)</b> | <b>N</b>    | <b>n (%)</b> |
| <b>Feasibility</b>                               |         |                      |              |                 |              |                     |              |             |              |
| New or updated KIS                               |         | 12                   | 9 (75%)      | 32              | 28 (88%)     | 28                  | 22 (79%)     | 16          | 15 (94%)     |
| KIS Quality                                      | Low     |                      | 4 (50%)      |                 | 13 (46%)     |                     | 10 (48%)     |             | 7 (47%)      |
|                                                  | Med     |                      | 2 (25%)      |                 | 10 (36%)     |                     | 8 (38%)      |             | 4 (27%)      |
|                                                  | High    |                      | 2 (25%)      |                 | 5 (18%)      |                     | 3 (14%)      |             | 4 (27%)      |
|                                                  | Missing |                      | 1 ()         |                 | 0 ()         |                     | 1 ()         |             | 0 ()         |
| Clear ACP                                        |         | 9                    | 5 (56%)      | 28              | 14 (50%)     | 22                  | 12 (55%)     | 15          | 7 (47%)      |
| Letter helped get an appointment to see your GP* |         | 4                    | 2 (50%)      | 13              | 9 (69%)      | 11                  | 8 (73%)      | 6           | 3 (50%)      |

\*Included in denominator if participants had provided any response (yes/no) to the question at either the 6 or 12 week questionnaire follow-up.

Abbreviations: ACP, Anticipatory care planning; GI, gastrointestinal; KIS, Key information summary; N, number.

## Supplementary Appendix S4: Additional qualitative data from interviews

### S4.1: Exemplar quotations showing different planning styles.

Just one out of eighteen patients interviewed had engaged proactively in ACP with their GP at the time of diagnosis (23P, control group). Patient, carer and GP were firm advocates of future care planning which was discussed, agreed and incorporated into the patient's KIS/ACP. ACP conversations continued throughout first and second interview data supported in field notes over the one-year study timeline. These patient/carer views may have related to their personal experiences of working in healthcare environments. The vast majority of patient-carer-GP triads did not follow this planning style and often delayed discussing ACP.

#### Interview triad – Early planner patient, carer and GP.

*'The GP did that as soon as she heard (diagnosis), she did that. I was quite pleased that it was asked (ACP). Yes, because I don't want to be the vegetable. If I can't wash and dress myself and feed myself then I don't think it's right to drag anybody down to make them do that. Even my wife who's a nurse would be able to do it, but I don't think that's fair. (wife interjects), "I mean, I'm not ill like you, but I would be the same. We do talk about things like that".'*

23P, patient and carer, control, 1st interview, 15/11/2019.

*'She guided me to go and see the hospice, see what the facilities were, have a chat she said, they're nice folk. The nurses said that as well. Our GP took the bull by the horns right from the start. She took the initiative, (name of doctor) asked me about end of life and asked if I wanted to be resuscitated as soon as I was diagnosed, and I said no.'*

23P, patient, control, 2nd interview, 06/02/2020.

The couple praised their GP, the cancer centre and NHS in general and were full of admiration of the 'sterling work' carried out by all. The GP talked about her patient with confidence and one got the impressions she knew him well which was also demonstrated by the patient.

*'He does, he has that set up, it was set up on the 19th September, giving a brief outline of his metastatic gastric cancer. He has a just in case box available for him in his home. It's viewed that this patient is for active medical management including hospital admission if required. It includes that he is on chemotherapy and at risk of infection and sepsis and that it due to be updated very shortly. I would say that he is extremely understanding of his illness. We have a DNR form in place as well.'*

23P, GP, control, interview, 06/01/2020.

Although pre-emptive, the doctor talked about her experiences as a GP during this interview. She remembered resistance from some patients when attempting to initiate ACP conversations. Her recollections seem to indicate, that no matter how pro-active a GP may prove, sometimes patients are just not open to these emotive discussions.

*'If a patient has cancer, we try to have one particular doctor who looks over and manages their care. So, he is actually on my list. I am aware of his cancer diagnosis and have been following him up with consultations. Some patients find it very difficult to engage with us as GP's or our primary health care team if they are very much fixated on what can oncology offer me. And sometimes, we as GPs feel that patients actually haven't got to that stage that it would be far better for them to come to terms with the fact that nothing more can be done for them. But there is a small patient group who cling on for that last bit of hope. And sometimes they are continued to be given that hope. And we find it difficult sometimes to step in as GPs and say, actually, maybe we should be looking at not having all this intensive treatment. Why don't we look at you know, going to the day hospice or trying to get some more enjoyment out of the time that you have. So, some of that is led by the patient, unfortunately.'*

**Interview triad – Early planner GP, evolving planner patient/carer.**

*‘At this point I don’t want to know anything more. That might put the fear in me. So, at this point I’m quite happy with the information that I’ve got.’*

38P, intervention patient, 1<sup>st</sup> interview, 05/03/2020.

*‘The KIS was started on 4<sup>th</sup> February. I discussed the KIS with her. I think the ACP was incorporated in the KIS, let me see, (pause, looking at screen) 17<sup>th</sup> February. Yes, ACP. I don’t see any updates for that. I don’t think she’s in touch with the palliative care team.’*

38P, intervention GP, interview, 24/06/2020.

*‘We’ve been down for a care plan. What she said was we’ll maybe pick up again at some point.’*

38P, intervention patient, 2<sup>nd</sup> interview, 23/07/2020.

**Interview triad – Early planner patient and carer. Evolving planner GP.**

3P was disappointed to recall the GP being conspicuous by his absence, having had no contact for five months since diagnosis.

*‘The GP, I’ve had no contact since he referred me to get the endoscopy.’*

3P, patient, control 1st interview, 25/04/2019

Due to their need to arrange future care, the patient’s carer spoke to oncology at their next clinic appointment and through this, oncology staff prompted the GP.

*‘We had an appointment with the oncologist days after the last interview and we spoke to him about it (lack of communication from GP). And I don’t know if he spoke to the GP or not, but things improved greatly. GP turned out to be very good at getting things done immediately and that’s what we needed. And he was absolutely brilliant with me when (name of patient) passed. The GP came into his own.’*

3P, carer, control, bereavement interview, 29/01/2020.

GP actions facilitated patient 3P’s wish to remain at home. Social work carers and district nurses swiftly became involved as a result of oncology mediation, resulting in all patient needs being met.

*‘He had easy access to us, district nurses in, syringe driver went up early, his symptoms were well controlled. You know, the wife was happy and comfortable with things. He was getting best treatment. You know, his pain was under control, he had no pain. We’d assess his pain, bowel, nausea symptoms. He had all the things for weight loss. The dietitian had been in. He’d had all these ENSURE® things, he’d bowel treatment and you know, nurses coming in, keep an eye on how things were going.’*

3P, GP, control, interview, 29/01/2020.

**Interview triad – Non-planner patient, evolving planner carer and GP.**

This patient was a non-planner and remained so throughout first and second interviews. His wife respected his wishes even though she would have preferred to start planning sooner.

*'Nobody's mentioned anything like that yet (ACP). I try not to think about it. I try to keep that to the back of my mind as much as I can whilst I'm still fit. If something changed drastically, my view is that I'll cross that bridge when I come to it.'*

16P, intervention patient, 2<sup>nd</sup> interview, 10/03/2020.

*'Different people obviously think in different ways. I think if that deterioration happens, hopefully a long way down the road, then that's when he would think about it. I've lived with him for 30 odd years, he won't make a decision if he doesn't want to make a decision.'*

16P, intervention carer, 2<sup>nd</sup> interview, 10/03/2020.

The GP took a similar view to the patient of not intervening while treatment continued, but also picked up the carers concerns and desire to start planning.

*'He's pretty self-sufficient to be honest. However, seeing him on Friday, there's a definite decline and his wife is starting to get worried about him as well. I think he's been in regular contact with oncology and being reviewed by them. If that tails off, he'll start coming to see me more.'*

16P, intervention GP, interview, 13/01/2020.

**Interview triad – Non-planner patient, (no carer), late planner GP.**

Another patient talked about handing his intervention letter into the GP practice but chose not to acknowledge his terminal diagnosis despite being given clear information at the oncology clinic. He therefore, saw no value in engaging with his GP.

*'I handed it into the receptionist. And I'll be honest with you, I did'nae (didn't) really need the doctor at the time, so I've never really bothered him. He's (GP) never been in touch about the cancer. Looking ahead with the cancer, I'm nae (not) worried about that. Mine's no (not) malignant, and it's no (not) spread. If I get another ten years, I'll be quite happy with that.'*

26P, patient, intervention, 1<sup>st</sup> interview, 06/12/2019.

When asked about his views of ACP, this man held fixed and clear opinions however, he did not make any attempt to have these wishes formally recorded.

*'I've never given that a thought. Well, I'm telling a lie there; I have thought about it and basically, I wouldn't want resuscitated. I wouldn't mind being asked that question, but I've never been asked. I feel that if my quality of life was over, I'd rather just be.'*

26P, intervention patient, 2<sup>nd</sup> interview, 03/03/2020.

The GP explained the patient's palliative care plan pathway and the approach of that GP practice.

*'The KIS has been activated but it simply says a new diagnosis of atrial fibrillation. We don't have a standard policy on palliative care. We are expected to make all of them a KIS with a palliative care summary. In reality, we have a lot of patients who you could call palliative, but who in terms of their day to day functioning are very well and have a full active, unrestricted life.'*

26P, intervention GP, interview, 03/03/2020.

#### S4.2: Care planning styles among intervention patients, carers and GPs interviewed.

| Table S3.2: Care planning styles – Intervention group interviews |             |                           |                                       |                                       |
|------------------------------------------------------------------|-------------|---------------------------|---------------------------------------|---------------------------------------|
| Triad                                                            | Participant | 1 <sup>st</sup> interview | 2 <sup>nd</sup> interview             | GP interview                          |
|                                                                  | 16P         | Non-planner               | Non-planner (spouse evolving planner) | Evolving planner (prompted by spouse) |
|                                                                  | 26P         | Non-planner               | Non-planner                           | Late planner                          |
|                                                                  | 28P         | Non-planner               | Non-planner (spouse evolving planner) | Early planner                         |
|                                                                  | 35P         | Non-planner               | Non-planner (spouse evolving planner) | Late planner                          |
|                                                                  | 38P         | Non-planner               | Evolving planner                      | Early planner                         |
|                                                                  | 43P         | Non-planner               | Non-planner                           | Early planner                         |
| <b>Dyad</b>                                                      |             |                           |                                       | <b>Patient view of GP*</b>            |
|                                                                  | 12P         | Non-planner               | Non-planner                           | Non-planner                           |
|                                                                  | 17P         | Non-planner               | Non-planner                           | Non-planner                           |
|                                                                  | 19P         | Non-planner               | Evolving planner                      | Early planner                         |
|                                                                  | 20P         | Non-planner               | Evolving planner                      | Evolving planner                      |
|                                                                  | 41P         | Early planner             | Early planner                         | Evolving planner                      |

\* Patient view as GP not interviewed.

#### S4.3: Care planning styles among control patients, carers and GPs interviewed.

| Table S3.3: Care planning styles – Control group interviews |             |                           |                           |                                         |
|-------------------------------------------------------------|-------------|---------------------------|---------------------------|-----------------------------------------|
| Triad                                                       | Participant | 1 <sup>st</sup> interview | 2 <sup>nd</sup> interview | GP interview                            |
|                                                             | 3P          | Early planner             | Early planner             | Evolving planner (prompted by oncology) |
|                                                             | 14P         | Non-planner               | Non-planner               | Late planner                            |
|                                                             | 21P         | Non-planner               | Evolving planner          | Evolving planner                        |
|                                                             | 23P         | Early planner             | Early planner             | Early planner                           |
| <b>Dyad</b>                                                 |             |                           |                           | <b>Patient view of GP*</b>              |
|                                                             | 29P         | Non-planner               | Non-planner               | Late planner                            |
|                                                             | 34P         | Early Planner             | Early planner             | Late planner                            |
|                                                             | 45P         | Non-planner               | Non-planner               | Evolving planner (prompted by COVID-19) |

\* Patient view as GP not interviewed.

**S5.1:****4. Clinical Outcomes****Table 4.1. EQ5D**

|                          | <b>Baseline</b> |                      |                     | <b>Week 6</b> |                      |                     | <b>Week 12</b> |                      |                     | <b>Week 24</b> |                      |                     | <b>Week 48</b> |                      |                     |
|--------------------------|-----------------|----------------------|---------------------|---------------|----------------------|---------------------|----------------|----------------------|---------------------|----------------|----------------------|---------------------|----------------|----------------------|---------------------|
|                          | <b>N</b>        | <b>Mean<br/>(SD)</b> | <b>Median [IQR]</b> | <b>N</b>      | <b>Mean<br/>(SD)</b> | <b>Median [IQR]</b> | <b>N</b>       | <b>Mean<br/>(SD)</b> | <b>Median [IQR]</b> | <b>N</b>       | <b>Mean<br/>(SD)</b> | <b>Median [IQR]</b> | <b>N</b>       | <b>Mean<br/>(SD)</b> | <b>Median [IQR]</b> |
| <b>EQ5D Health Index</b> |                 |                      |                     |               |                      |                     |                |                      |                     |                |                      |                     |                |                      |                     |
| C                        | 14              | 0.71 (0.11)          | 0.70 [0.66-0.75]    | 11            | 0.66 (0.17)          | 0.68 [0.54-0.80]    | 12             | 0.77 (0.11)          | 0.74 [0.68-0.86]    | 12             | 0.69 (0.18)          | 0.75 [0.63-0.81]    | 2              | 0.34 (0.56)          | 0.34 [-0.06-0.74]   |
| I                        | 20              | 0.72 (0.14)          | 0.73 [0.66-0.84]    | 17            | 0.71 (0.14)          | 0.72 [0.68-0.75]    | 13             | 0.68 (0.28)          | 0.68 [0.64-0.84]    | 9              | 0.57 (0.26)          | 0.55 [0.53-0.71]    | 4              | 0.67 (0.29)          | 0.69 [0.48-0.86]    |
| Overall                  | 34              | 0.71 (0.13)          | 0.72 [0.66-0.81]    | 28            | 0.69 (0.15)          | 0.72 [0.64-0.77]    | 25             | 0.73 (0.22)          | 0.73 [0.65-0.84]    | 21             | 0.64 (0.22)          | 0.71 [0.55-0.77]    | 6              | 0.56 (0.38)          | 0.69 [0.30-0.74]    |
| <b>EQ5D VAS</b>          |                 |                      |                     |               |                      |                     |                |                      |                     |                |                      |                     |                |                      |                     |
| C                        | 14              | 69.50<br>(14.77)     | 72.5 [65.0-80.0]    | 12            | 70.83<br>(18.57)     | 72.5 [67.5-80.0]    | 12             | 70.67<br>(19.84)     | 75.0 [57.5-85.0]    | 12             | 72.33<br>(15.28)     | 72.5 [60.0-82.5]    | 2              | 55.00<br>(63.64)     | 55.0 [10.0-100.0]   |
| I                        | 20              | 71.90<br>(19.00)     | 75.0 [65.0-85.0]    | 17            | 72.24<br>(15.91)     | 75.0 [60.0-85.0]    | 13             | 74.08<br>(14.84)     | 75.0 [65.0-80.0]    | 9              | 70.00<br>(14.79)     | 65.0 [60.0-85.0]    | 4              | 73.75<br>(16.52)     | 75.0 [60.0-87.5]    |
| Overall                  | 34              | 70.91<br>(17.18)     | 75.0 [65.0-85.0]    | 29            | 71.66<br>(16.75)     | 75.0 [60.0-80.0]    | 25             | 72.44<br>(17.13)     | 75.0 [65.0-80.0]    | 21             | 71.33<br>(14.74)     | 70.0 [60.0-85.0]    | 6              | 67.50<br>(32.67)     | 75.0 [55.0-90.0]    |

Abbreviations: C, control; I, intervention; IQR, interquartile range; N, number; SD, standard deviation.



**S5.2:****4. Clinical Outcomes****Table 4.2a. ICE-CAP - Having a say.**

|                                                                                                     | <i>All N=46</i> | <i>Intervention<br/>N=25</i> | <i>Control<br/>N=21</i> |
|-----------------------------------------------------------------------------------------------------|-----------------|------------------------------|-------------------------|
| <b>Baseline</b>                                                                                     |                 |                              |                         |
| 1, I am never able to make decisions that I need to make about my life and care                     | 0 (0%)          | 0 (0%)                       | 0 (0%)                  |
| 2, I am able to make decisions that I need to make about my life and care only a little of the time | 0 (0%)          | 0 (0%)                       | 0 (0%)                  |
| 3, I am able to make decisions that I need to make about my life and care some of the time          | 0 (0%)          | 0 (0%)                       | 0 (0%)                  |
| 4, I am able to make decisions that I need to make about my life and care most of the time          | 34 (100%)       | 20 (100%)                    | 14 (100%)               |
| Missing                                                                                             | 12 ( )          | 5 ( )                        | 7 ( )                   |
| <b>Week 6</b>                                                                                       |                 |                              |                         |
| 1, I am never able to make decisions that I need to make about my life and care                     | 0 (0%)          | 0 (0%)                       | 0 (0%)                  |
| 2, I am able to make decisions that I need to make about my life and care only a little of the time | 0 (0%)          | 0 (0%)                       | 0 (0%)                  |
| 3, I am able to make decisions that I need to make about my life and care some of the time          | 0 (0%)          | 0 (0%)                       | 0 (0%)                  |
| 4, I am able to make decisions that I need to make about my life and care most of the time          | 29 (100%)       | 17 (100%)                    | 12 (100%)               |
| Missing                                                                                             | 17 ( )          | 8 ( )                        | 9 ( )                   |
| <b>Week 12</b>                                                                                      |                 |                              |                         |
| 1, I am never able to make decisions that I need to make about my life and care                     | 0 (0%)          | 0 (0%)                       | 0 (0%)                  |
| 2, I am able to make decisions that I need to make about my life and care only a little of the time | 0 (0%)          | 0 (0%)                       | 0 (0%)                  |
| 3, I am able to make decisions that I need to make about my life and care some of the time          | 3 (12%)         | 1 (8%)                       | 2 (17%)                 |
| 4, I am able to make decisions that I need to make about my life and care most of the time          | 22 (88%)        | 12 (92%)                     | 10 (83%)                |
| Missing                                                                                             | 21 ( )          | 12 ( )                       | 9 ( )                   |
| <b>Week 24</b>                                                                                      |                 |                              |                         |
| 1, I am never able to make decisions that I need to make about my life and care                     | 0 (0%)          | 0 (0%)                       | 0 (0%)                  |
| 2, I am able to make decisions that I need to make about my life and care only a little of the time | 0 (0%)          | 0 (0%)                       | 0 (0%)                  |
| 3, I am able to make decisions that I need to make about my life and care some of the time          | 0 (0%)          | 0 (0%)                       | 0 (0%)                  |
| 4, I am able to make decisions that I need to make about my life and care most of the time          | 22 (100%)       | 10 (100%)                    | 12 (100%)               |
| Missing                                                                                             | 24 ( )          | 15 ( )                       | 9 ( )                   |

**S5.2 continued:****4. Clinical Outcomes****Table 4.2a. ICE-CAP - Having a say.**

|                                                                                                     | <i>All N=46</i> | <i>Intervention<br/>N=25</i> | <i>Control<br/>N=21</i> |
|-----------------------------------------------------------------------------------------------------|-----------------|------------------------------|-------------------------|
| <b>Week 48</b>                                                                                      |                 |                              |                         |
| 1, I am never able to make decisions that I need to make about my life and care                     | 0 (0%)          | 0 (0%)                       | 0 (0%)                  |
| 2, I am able to make decisions that I need to make about my life and care only a little of the time | 0 (0%)          | 0 (0%)                       | 0 (0%)                  |
| 3, I am able to make decisions that I need to make about my life and care some of the time          | 0 (0%)          | 0 (0%)                       | 0 (0%)                  |
| 4, I am able to make decisions that I need to make about my life and care most of the time          | 6 (100%)        | 4 (100%)                     | 2 (100%)                |
| Missing                                                                                             | 40 ( )          | 21 ( )                       | 19 ( )                  |
| Numbers are n (%).                                                                                  |                 |                              |                         |

**S5.2 continued:****4. Clinical Outcomes****Table 4.2b. ICE-CAP - being with people who care.**

|                                                                                          | <b>All<br/>N=46</b> | <b>Intervention<br/>N=25</b> | <b>Control<br/>N=21</b> |
|------------------------------------------------------------------------------------------|---------------------|------------------------------|-------------------------|
| <b>Baseline</b>                                                                          |                     |                              |                         |
| 1, If I want to, I am never able to be with people who care about me                     | 0 (0%)              | 0 (0%)                       | 0 (0%)                  |
| 2, If I want to, I am able to be with people who care about me only a little of          | 0 (0%)              | 0 (0%)                       | 0 (0%)                  |
| 3, If I want to, I am able to be with people who care about me some of the time          | 2 (6%)              | 1 (5%)                       | 1 (7%)                  |
| 4, If I want to, I am able to be with people who care about me most of the time          | 32 (94%)            | 19 (95%)                     | 13 (93%)                |
| Missing                                                                                  | 12 ( )              | 5 ( )                        | 7 ( )                   |
| <b>Week 6</b>                                                                            |                     |                              |                         |
| 1, If I want to, I am never able to be with people who care about me                     | 0 (0%)              | 0 (0%)                       | 0 (0%)                  |
| 2, If I want to, I am able to be with people who care about me only a little of          | 0 (0%)              | 0 (0%)                       | 0 (0%)                  |
| 3, If I want to, I am able to be with people who care about me some of the time          | 1 (3%)              | 0 (0%)                       | 1 (8%)                  |
| 4, If I want to, I am able to be with people who care about me most of the time          | 28 (97%)            | 17 (100%)                    | 11 (92%)                |
| Missing                                                                                  | 17 ( )              | 8 ( )                        | 9 ( )                   |
| <b>Week 12</b>                                                                           |                     |                              |                         |
| 1, If I want to, I am never able to be with people who care about me                     | 1 (4%)              | 0 (0%)                       | 1 (8%)                  |
| 2, If I want to, I am able to be with people who care about me only a little of          | 0 (0%)              | 0 (0%)                       | 0 (0%)                  |
| 3, If I want to, I am able to be with people who care about me some of the time          | 4 (16%)             | 2 (15%)                      | 2 (17%)                 |
| 4, If I want to, I am able to be with people who care about me most of the time          | 20 (80%)            | 11 (85%)                     | 9 (75%)                 |
| Missing                                                                                  | 21 ( )              | 12 ( )                       | 9 ( )                   |
| <b>Week 24</b>                                                                           |                     |                              |                         |
| 1, If I want to, I am never able to be with people who care about me                     | 0 (0%)              | 0 (0%)                       | 0 (0%)                  |
| 2, If I want to, I am able to be with people who care about me only a little of the time | 2 (9%)              | 0 (0%)                       | 2 (17%)                 |
| 3, If I want to, I am able to be with people who care about me some of the time          | 2 (9%)              | 1 (10%)                      | 1 (8%)                  |
| 4, If I want to, I am able to be with people who care about me most of the time          | 18 (82%)            | 9 (90%)                      | 9 (75%)                 |
| Missing                                                                                  | 24 ( )              | 15 ( )                       | 9 ( )                   |
| <b>Week 48</b>                                                                           |                     |                              |                         |
| 1, If I want to, I am never able to be with people who care about me                     | 0 (0%)              | 0 (0%)                       | 0 (0%)                  |
| 2, If I want to, I am able to be with people who care about me only a little of the time | 1 (17%)             | 1 (25%)                      | 0 (0%)                  |
| 3, If I want to, I am able to be with people who care about me some of the time          | 0 (0%)              | 0 (0%)                       | 0 (0%)                  |
| 4, If I want to, I am able to be with people who care about me most of the time          | 5 (83%)             | 3 (75%)                      | 2 (100%)                |
| Missing                                                                                  | 40 ( )              | 21 ( )                       | 19 ( )                  |
| Numbers are n (%).                                                                       |                     |                              |                         |

**S5.2 continued:****4. Clinical Outcomes****Table 4.2c. ICE-CAP - physical suffering.**

|                                                           | <b>All<br/>N=46</b> | <b>Intervention<br/>N=25</b> | <b>Control<br/>N=21</b> |
|-----------------------------------------------------------|---------------------|------------------------------|-------------------------|
| <b>Baseline</b>                                           |                     |                              |                         |
| 1, I always experience significant discomfort             | 2 (6%)              | 2 (10%)                      | 0 (0%)                  |
| 2, I often experience significant physical discomfort     | 8 (24%)             | 4 (20%)                      | 4 (29%)                 |
| 3, I sometimes experience significant physical discomfort | 10 (29%)            | 7 (35%)                      | 3 (21%)                 |
| 4, I rarely experience significant physical discomfort    | 14 (41%)            | 7 (35%)                      | 7 (50%)                 |
| Missing                                                   | 12 ( )              | 5 ( )                        | 7 ( )                   |
| <b>Week 6</b>                                             |                     |                              |                         |
| 1, I always experience significant discomfort             | 2 (7%)              | 1 (6%)                       | 1 (8%)                  |
| 2, I often experience significant physical discomfort     | 6 (21%)             | 4 (24%)                      | 2 (17%)                 |
| 3, I sometimes experience significant physical discomfort | 10 (34%)            | 4 (24%)                      | 6 (50%)                 |
| 4, I rarely experience significant physical discomfort    | 11 (38%)            | 8 (47%)                      | 3 (25%)                 |
| Missing                                                   | 17 ( )              | 8 ( )                        | 9 ( )                   |
| <b>Week 12</b>                                            |                     |                              |                         |
| 1, I always experience significant discomfort             | 1 (4%)              | 1 (8%)                       | 0 (0%)                  |
| 2, I often experience significant physical discomfort     | 3 (12%)             | 2 (15%)                      | 1 (8%)                  |
| 3, I sometimes experience significant physical discomfort | 11 (44%)            | 3 (23%)                      | 8 (67%)                 |
| 4, I rarely experience significant physical discomfort    | 10 (40%)            | 7 (54%)                      | 3 (25%)                 |
| Missing                                                   | 21 ( )              | 12 ( )                       | 9 ( )                   |
| <b>Week 24</b>                                            |                     |                              |                         |
| 1, I always experience significant discomfort             | 1 (5%)              | 1 (10%)                      | 0 (0%)                  |
| 2, I often experience significant physical discomfort     | 4 (18%)             | 3 (30%)                      | 1 (8%)                  |
| 3, I sometimes experience significant physical discomfort | 10 (45%)            | 4 (40%)                      | 6 (50%)                 |
| 4, I rarely experience significant physical discomfort    | 7 (32%)             | 2 (20%)                      | 5 (42%)                 |
| Missing                                                   | 24 ( )              | 15 ( )                       | 9 ( )                   |

**S5.2 continued:****4. Clinical Outcomes****Table 4.2c. ICE-CAP - physical suffering.**

|                                                           | <i><b>All<br/>N=46</b></i> | <i><b>Intervention<br/>N=25</b></i> | <i><b>Control<br/>N=21</b></i> |
|-----------------------------------------------------------|----------------------------|-------------------------------------|--------------------------------|
| <b>Week 48</b>                                            |                            |                                     |                                |
| 1, I always experience significant discomfort             | 2 (33%)                    | 1 (25%)                             | 1 (50%)                        |
| 2, I often experience significant physical discomfort     | 1 (17%)                    | 1 (25%)                             | 0 (0%)                         |
| 3, I sometimes experience significant physical discomfort | 2 (33%)                    | 1 (25%)                             | 1 (50%)                        |
| 4, I rarely experience significant physical discomfort    | 1 (17%)                    | 1 (25%)                             | 0 (0%)                         |
| Missing                                                   | 40 ( )                     | 21 ( )                              | 19 ( )                         |
| Numbers are n (%).                                        |                            |                                     |                                |

**S5.2 continued:****4. Clinical Outcomes****Table 4.2d. ICE-CAP - emotional suffering.**

|                                               | <b>All<br/>N=46</b> | <b>Intervention<br/>N=25</b> | <b>Control<br/>N=21</b> |
|-----------------------------------------------|---------------------|------------------------------|-------------------------|
| <b>Baseline</b>                               |                     |                              |                         |
| 1, I always experience emotional suffering    | 2 (6%)              | 1 (5%)                       | 1 (7%)                  |
| 2, I often experience emotional suffering     | 3 (9%)              | 3 (15%)                      | 0 (0%)                  |
| 3, I sometimes experience emotional suffering | 19 (56%)            | 12 (60%)                     | 7 (50%)                 |
| 4, I rarely experience emotional suffering    | 10 (29%)            | 4 (20%)                      | 6 (43%)                 |
| Missing                                       | 12 ( )              | 5 ( )                        | 7 ( )                   |
| <b>Week 6</b>                                 |                     |                              |                         |
| 1, I always experience emotional suffering    | 0 (0%)              | 0 (0%)                       | 0 (0%)                  |
| 2, I often experience emotional suffering     | 2 (7%)              | 0 (0%)                       | 2 (17%)                 |
| 3, I sometimes experience emotional suffering | 11 (38%)            | 8 (47%)                      | 3 (25%)                 |
| 4, I rarely experience emotional suffering    | 16 (55%)            | 9 (53%)                      | 7 (58%)                 |
| Missing                                       | 17 ( )              | 8 ( )                        | 9 ( )                   |
| <b>Week 12</b>                                |                     |                              |                         |
| 1, I always experience emotional suffering    | 0 (0%)              | 0 (0%)                       | 0 (0%)                  |
| 2, I often experience emotional suffering     | 3 (12%)             | 1 (8%)                       | 2 (17%)                 |
| 3, I sometimes experience emotional suffering | 11 (44%)            | 6 (46%)                      | 5 (42%)                 |
| 4, I rarely experience emotional suffering    | 11 (44%)            | 6 (46%)                      | 5 (42%)                 |
| Missing                                       | 21 ( )              | 12 ( )                       | 9 ( )                   |
| <b>Week 24</b>                                |                     |                              |                         |
| 1, I always experience emotional suffering    | 0 (0%)              | 0 (0%)                       | 0 (0%)                  |
| 2, I often experience emotional suffering     | 0 (0%)              | 0 (0%)                       | 0 (0%)                  |
| 3, I sometimes experience emotional suffering | 10 (45%)            | 5 (50%)                      | 5 (42%)                 |
| 4, I rarely experience emotional suffering    | 12 (55%)            | 5 (50%)                      | 7 (58%)                 |
| Missing                                       | 24 ( )              | 15 ( )                       | 9 ( )                   |
| <b>Week 48</b>                                |                     |                              |                         |
| 1, I always experience emotional suffering    | 0 (0%)              | 0 (0%)                       | 0 (0%)                  |
| 2, I often experience emotional suffering     | 0 (0%)              | 0 (0%)                       | 0 (0%)                  |
| 3, I sometimes experience emotional suffering | 2 (33%)             | 1 (25%)                      | 1 (50%)                 |
| 4, I rarely experience emotional suffering    | 4 (67%)             | 3 (75%)                      | 1 (50%)                 |
| Missing                                       | 40 ( )              | 21 ( )                       | 19 ( )                  |
| Numbers are n (%).                            |                     |                              |                         |

**S5.2 continued:****4. Clinical Outcomes****Table 4.2e. ICE-CAP - dignity.**

|                                                                       | <b>All N=46</b> | <b>Intervention<br/>N=25</b> | <b>Control<br/>N=21</b> |
|-----------------------------------------------------------------------|-----------------|------------------------------|-------------------------|
| <b>Baseline</b>                                                       |                 |                              |                         |
| 1, I am never able to maintain my dignity and self-respect            | 0 (0%)          | 0 (0%)                       | 0 (0%)                  |
| 2, I am able to maintain my dignity and self-respect only a little of | 0 (0%)          | 0 (0%)                       | 0 (0%)                  |
| 3, I am able to maintain my dignity and self-respect some of the time | 0 (0%)          | 0 (0%)                       | 0 (0%)                  |
| 4, I am able to maintain my dignity and self-respect most of the time | 33 (100%)       | 20 (100%)                    | 13 (100%)               |
| Missing                                                               | 13 ( )          | 5 ( )                        | 8 ( )                   |
| <b>Week 6</b>                                                         |                 |                              |                         |
| 1, I am never able to maintain my dignity and self-respect            | 0 (0%)          | 0 (0%)                       | 0 (0%)                  |
| 2, I am able to maintain my dignity and self-respect only a little of | 0 (0%)          | 0 (0%)                       | 0 (0%)                  |
| 3, I am able to maintain my dignity and self-respect some of the time | 1 (3%)          | 1 (6%)                       | 0 (0%)                  |
| 4, I am able to maintain my dignity and self-respect most of the time | 28 (97%)        | 16 (94%)                     | 12 (100%)               |
| Missing                                                               | 17 ( )          | 8 ( )                        | 9 ( )                   |
| <b>Week 12</b>                                                        |                 |                              |                         |
| 1, I am never able to maintain my dignity and self-respect            | 0 (0%)          | 0 (0%)                       | 0 (0%)                  |
| 2, I am able to maintain my dignity and self-respect only a little of | 0 (0%)          | 0 (0%)                       | 0 (0%)                  |
| 3, I am able to maintain my dignity and self-respect some of the time | 2 (8%)          | 2 (15%)                      | 0 (0%)                  |
| 4, I am able to maintain my dignity and self-respect most of the time | 23 (92%)        | 11 (85%)                     | 12 (100%)               |
| Missing                                                               | 21 ( )          | 12 ( )                       | 9 ( )                   |
| <b>Week 24</b>                                                        |                 |                              |                         |
| 1, I am never able to maintain my dignity and self-respect            | 0 (0%)          | 0 (0%)                       | 0 (0%)                  |
| 2, I am able to maintain my dignity and self-respect only a little of | 0 (0%)          | 0 (0%)                       | 0 (0%)                  |
| 3, I am able to maintain my dignity and self-respect some of the time | 0 (0%)          | 0 (0%)                       | 0 (0%)                  |
| 4, I am able to maintain my dignity and self-respect most of the time | 22 (100%)       | 10 (100%)                    | 12 (100%)               |
| Missing                                                               | 24 ( )          | 15 ( )                       | 9 ( )                   |
| <b>Week 48</b>                                                        |                 |                              |                         |
| 1, I am never able to maintain my dignity and self-respect            | 0 (0%)          | 0 (0%)                       | 0 (0%)                  |
| 2, I am able to maintain my dignity and self-respect only a little of | 0 (0%)          | 0 (0%)                       | 0 (0%)                  |

**S5.2 continued:****4. Clinical Outcomes****Table 4.2e. ICE-CAP - dignity.**

|                                                                       | <b><i>All N=46</i></b> | <b><i>Intervention<br/>N=25</i></b> | <b><i>Control<br/>N=21</i></b> |
|-----------------------------------------------------------------------|------------------------|-------------------------------------|--------------------------------|
| 3, I am able to maintain my dignity and self-respect some of the time | 0 (0%)                 | 0 (0%)                              | 0 (0%)                         |
| 4, I am able to maintain my dignity and self-respect most of the time | 6 (100%)               | 4 (100%)                            | 2 (100%)                       |
| Missing                                                               | 40 ()                  | 21 ()                               | 19 ()                          |
| Numbers are n (%).                                                    |                        |                                     |                                |



**S5.2 continued:****4. Clinical Outcomes****Table 4.2f. ICE-CAP - being supported.**

|                                                                        | <i>All N=46</i> | <i>Intervention<br/>N=25</i> | <i>Control<br/>N=21</i> |
|------------------------------------------------------------------------|-----------------|------------------------------|-------------------------|
| <b>Baseline</b>                                                        |                 |                              |                         |
| 1, I am never able to have the help and support that I need            | 0 (0%)          | 0 (0%)                       | 0 (0%)                  |
| 2, I am able to have the help and support that I need only a little of | 0 (0%)          | 0 (0%)                       | 0 (0%)                  |
| 3, I am able to have the help and support that I need some of the time | 0 (0%)          | 0 (0%)                       | 0 (0%)                  |
| 4, I am able to have the help and support that I need most of the time | 33 (100%)       | 20 (100%)                    | 13 (100%)               |
| Missing                                                                | 13 ( )          | 5 ( )                        | 8 ( )                   |
| <b>Week 6</b>                                                          |                 |                              |                         |
| 1, I am never able to have the help and support that I need            | 0 (0%)          | 0 (0%)                       | 0 (0%)                  |
| 2, I am able to have the help and support that I need only a little of | 0 (0%)          | 0 (0%)                       | 0 (0%)                  |
| 3, I am able to have the help and support that I need some of the time | 2 (7%)          | 2 (12%)                      | 0 (0%)                  |
| 4, I am able to have the help and support that I need most of the time | 27 (93%)        | 15 (88%)                     | 12 (100%)               |
| Missing                                                                | 17 ( )          | 8 ( )                        | 9 ( )                   |
| <b>Week 12</b>                                                         |                 |                              |                         |
| 1, I am never able to have the help and support that I need            | 0 (0%)          | 0 (0%)                       | 0 (0%)                  |
| 2, I am able to have the help and support that I need only a little of | 0 (0%)          | 0 (0%)                       | 0 (0%)                  |
| 3, I am able to have the help and support that I need some of the time | 1 (4%)          | 1 (8%)                       | 0 (0%)                  |
| 4, I am able to have the help and support that I need most of the time | 24 (96%)        | 12 (92%)                     | 12 (100%)               |
| Missing                                                                | 21 ( )          | 12 ( )                       | 9 ( )                   |
| <b>Week 24</b>                                                         |                 |                              |                         |
| 1, I am never able to have the help and support that I need            | 0 (0%)          | 0 (0%)                       | 0 (0%)                  |
| 2, I am able to have the help and support that I need only a little of | 0 (0%)          | 0 (0%)                       | 0 (0%)                  |
| 3, I am able to have the help and support that I need some of the time | 1 (5%)          | 0 (0%)                       | 1 (8%)                  |
| 4, I am able to have the help and support that I need most of the time | 21 (95%)        | 10 (100%)                    | 11 (92%)                |
| Missing                                                                | 24 ( )          | 15 ( )                       | 9 ( )                   |
| <b>Week 48</b>                                                         |                 |                              |                         |
| 1, I am never able to have the help and support that I need            | 0 (0%)          | 0 (0%)                       | 0 (0%)                  |
| 2, I am able to have the help and support that I need only a little of | 0 (0%)          | 0 (0%)                       | 0 (0%)                  |

**S5.2 continued:****4. Clinical Outcomes****Table 4.2f. ICE-CAP - being supported.**

|                                                                        | <b><i>All N=46</i></b> | <b><i>Intervention<br/>N=25</i></b> | <b><i>Control<br/>N=21</i></b> |
|------------------------------------------------------------------------|------------------------|-------------------------------------|--------------------------------|
| 3, I am able to have the help and support that I need some of the time | 0 (0%)                 | 0 (0%)                              | 0 (0%)                         |
| 4, I am able to have the help and support that I need most of the time | 6 (100%)               | 4 (100%)                            | 2 (100%)                       |
| Missing                                                                | 40 ()                  | 21 ()                               | 19 ()                          |
| Numbers are n (%).                                                     |                        |                                     |                                |

**S5.3:****4. Clinical Outcomes****Table 4.3a.CollaboRATE for patients: Questions about appointment you just had with your oncologist**

|                                                                                                           | <b>Baseline</b> |                      |                     | <b>Week 6</b> |                      |                     | <b>Week 12</b> |                      |                     | <b>Week 24</b> |                      |                     | <b>Week 48</b> |                      |                     |
|-----------------------------------------------------------------------------------------------------------|-----------------|----------------------|---------------------|---------------|----------------------|---------------------|----------------|----------------------|---------------------|----------------|----------------------|---------------------|----------------|----------------------|---------------------|
|                                                                                                           | <b>N</b>        | <b>Mean<br/>(SD)</b> | <b>Median [IQR]</b> | <b>N</b>      | <b>Mean<br/>(SD)</b> | <b>Median [IQR]</b> | <b>N</b>       | <b>Mean<br/>(SD)</b> | <b>Median [IQR]</b> | <b>N</b>       | <b>Mean<br/>(SD)</b> | <b>Median [IQR]</b> | <b>N</b>       | <b>Mean<br/>(SD)</b> | <b>Median [IQR]</b> |
| <b>How much effort was made to help you understand your health issues?</b>                                |                 |                      |                     |               |                      |                     |                |                      |                     |                |                      |                     |                |                      |                     |
| C                                                                                                         | 14              | 8.14 (1.29)          | 9.0 [8.0-9.0]       | 12            | 8.50 (0.90)          | 9.0 [8.0-9.0]       | 12             | 8.25 (0.97)          | 8.5 [8.0-9.0]       | 12             | 8.58 (0.90)          | 9.0 [8.5-9.0]       | 2              | 9.00 (0.00)          | 9.0 [9.0-9.0]       |
| I                                                                                                         | 20              | 8.35 (1.42)          | 9.0 [8.5-9.0]       | 16            | 8.44 (0.89)          | 9.0 [8.0-9.0]       | 13             | 8.62 (0.65)          | 9.0 [8.0-9.0]       | 10             | 8.60 (0.52)          | 9.0 [8.0-9.0]       | 4              | 8.00 (1.15)          | 8.0 [7.0-9.0]       |
| Overall                                                                                                   | 34              | 8.26 (1.36)          | 9.0 [8.0-9.0]       | 28            | 8.46 (0.88)          | 9.0 [8.0-9.0]       | 25             | 8.44 (0.82)          | 9.0 [8.0-9.0]       | 22             | 8.59 (0.73)          | 9.0 [8.0-9.0]       | 6              | 8.33 (1.03)          | 9.0 [7.0-9.0]       |
| <b>How much effort was made to listen to the things that matter most to you about your health issues?</b> |                 |                      |                     |               |                      |                     |                |                      |                     |                |                      |                     |                |                      |                     |
| C                                                                                                         | 14              | 8.29 (1.14)          | 9.0 [8.0-9.0]       | 12            | 8.50 (0.90)          | 9.0 [8.0-9.0]       | 12             | 8.25 (0.87)          | 8.0 [8.0-9.0]       | 12             | 8.33 (1.15)          | 9.0 [8.0-9.0]       | 2              | 9.00 (0.00)          | 9.0 [9.0-9.0]       |
| I                                                                                                         | 20              | 8.40 (1.14)          | 9.0 [8.0-9.0]       | 17            | 8.53 (0.51)          | 9.0 [8.0-9.0]       | 13             | 8.31 (1.70)          | 9.0 [9.0-9.0]       | 10             | 8.70 (0.48)          | 9.0 [8.0-9.0]       | 4              | 8.00 (1.15)          | 8.0 [7.0-9.0]       |
| Overall                                                                                                   | 34              | 8.35 (1.12)          | 9.0 [8.0-9.0]       | 29            | 8.52 (0.69)          | 9.0 [8.0-9.0]       | 25             | 8.28 (1.34)          | 9.0 [8.0-9.0]       | 22             | 8.50 (0.91)          | 9.0 [8.0-9.0]       | 6              | 8.33 (1.03)          | 9.0 [7.0-9.0]       |
| <b>How much effort was made to include what matters most to you in choosing what to do next?</b>          |                 |                      |                     |               |                      |                     |                |                      |                     |                |                      |                     |                |                      |                     |
| C                                                                                                         | 14              | 8.21 (1.19)          | 9.0 [8.0-9.0]       | 12            | 8.50 (1.00)          | 9.0 [8.5-9.0]       | 12             | 7.92 (1.08)          | 8.0 [7.0-9.0]       | 12             | 8.33 (1.07)          | 9.0 [7.5-9.0]       | 2              | 9.00 (0.00)          | 9.0 [9.0-9.0]       |
| I                                                                                                         | 20              | 8.30 (1.38)          | 9.0 [8.0-9.0]       | 15            | 8.33 (1.18)          | 9.0 [8.0-9.0]       | 13             | 8.38 (0.87)          | 9.0 [8.0-9.0]       | 10             | 8.70 (0.67)          | 9.0 [9.0-9.0]       | 4              | 8.00 (1.15)          | 8.0 [7.0-9.0]       |
| Overall                                                                                                   | 34              | 8.26 (1.29)          | 9.0 [8.0-9.0]       | 27            | 8.41 (1.08)          | 9.0 [8.0-9.0]       | 25             | 8.16 (0.99)          | 9.0 [7.0-9.0]       | 22             | 8.50 (0.91)          | 9.0 [8.0-9.0]       | 6              | 8.33 (1.03)          | 9.0 [7.0-9.0]       |

Abbreviations: C, control; I, intervention; IQR, interquartile range;N, number; SD, standard deviation.

Scores range from 0 (no effort was made) to 9 (every effort was made).

**S5.3 continued:****4. Clinical Outcomes****Table 4.3b.CollaboRATE for patients**

|                               | <b>Baseline</b> |                      |                        | <b>Week 6</b> |                      |                        | <b>Week 12</b> |                      |                        | <b>Week 24</b> |                      |                        | <b>Week 48</b> |                      |                         |
|-------------------------------|-----------------|----------------------|------------------------|---------------|----------------------|------------------------|----------------|----------------------|------------------------|----------------|----------------------|------------------------|----------------|----------------------|-------------------------|
|                               | <b>N</b>        | <b>Mean<br/>(SD)</b> | <b>Median [IQR]</b>    | <b>N</b>      | <b>Mean<br/>(SD)</b> | <b>Median [IQR]</b>    | <b>N</b>       | <b>Mean<br/>(SD)</b> | <b>Median [IQR]</b>    | <b>N</b>       | <b>Mean<br/>(SD)</b> | <b>Median [IQR]</b>    | <b>N</b>       | <b>Mean<br/>(SD)</b> | <b>Median [IQR]</b>     |
| <b>CollaboRATE Mean Score</b> |                 |                      |                        |               |                      |                        |                |                      |                        |                |                      |                        |                |                      |                         |
| C                             | 14              | 91.27<br>(13.20)     | 100.0 [88.9-<br>100.0] | 12            | 94.44<br>(10.17)     | 100.0 [90.7-<br>100.0] | 12             | 90.43<br>(10.41)     | 90.7 [85.2-<br>100.0]  | 12             | 93.52<br>(10.37)     | 100.0 [87.0-<br>100.0] | 2              | 100.0<br>(0.00)      | 100.0 [100.0-<br>100.0] |
| I                             | 20              | 92.78<br>(14.19)     | 100.0 [88.9-<br>100.0] | 15            | 93.58<br>(8.57)      | 100.0 [88.9-<br>100.0] | 13             | 93.73<br>(10.41)     | 100.0 [92.6-<br>100.0] | 10             | 96.30<br>(5.52)      | 100.0 [92.6-<br>100.0] | 4              | 88.89<br>(12.83)     | 88.9 [77.8-<br>100.0]   |
| Overall                       | 34              | 92.16<br>(13.61)     | 100.0 [88.9-<br>100.0] | 27            | 93.96<br>(9.14)      | 100.0 [88.9-<br>100.0] | 25             | 92.15<br>(10.33)     | 96.3 [85.2-<br>100.0]  | 22             | 94.78<br>(8.45)      | 100.0 [88.9-<br>100.0] | 6              | 92.59<br>(11.48)     | 100.0 [77.8-<br>100.0]  |
| <b>CollaboRATE Top Score*</b> |                 |                      |                        |               |                      |                        |                |                      |                        |                |                      |                        |                |                      |                         |
| C                             | 14              | 8 (57%)              | -                      | 12            | 8 (67%)              | -                      | 12             | 5 (42%)              | -                      | 12             | 7 (58%)              | -                      | 2              | 2 (100%)             | -                       |
| I                             | 20              | 14 (70%)             | -                      | 15            | 8 (53%)              | -                      | 13             | 7 (54%)              | -                      | 10             | 6 (60%)              | -                      | 4              | 2 (50%)              | -                       |
| Overall                       | 34              | 22 (65%)             | -                      | 27            | 16 (59%)             | -                      | 25             | 12 (48%)             | -                      | 22             | 13 (59%)             | -                      | 6              | 4 (67%)              | -                       |

Abbreviations: C, control; I, intervention; IQR, interquartile range; N, number; SD, standard deviation.

CollaboRATE Mean Score: Higher scores represent more shared decision making (range 0-100).

CollaboRATE Top Score: Proportion of patients for whom there was 'gold standard' shared decision making.

\*Numbers are n (%).

**S5.4:****4. Clinical Outcomes****Table 4.4. Service use.**

|                                           | <i>All N=46</i> | <i>Intervention<br/>N=25</i> | <i>Control N=21</i> |
|-------------------------------------------|-----------------|------------------------------|---------------------|
| <b>Total oncology treatments</b>          |                 |                              |                     |
| N                                         | 44              | 24                           | 20                  |
| Mean (SD)                                 | 5.2 (5.8)       | 6.0 (7.1)                    | 4.3 (3.7)           |
| Median [Q1-Q3]                            | 3.5 [2.0-6.0]   | 4.0 [2.0-6.5]                | 3.0 [2.0-6.0]       |
| <b>Total hospital admissions</b>          |                 |                              |                     |
| N                                         | 45              | 24                           | 21                  |
| Mean (SD)                                 | 2.3 (1.8)       | 2.7 (2.1)                    | 1.8 (1.2)           |
| Median [Q1-Q3]                            | 2.0 [1.0-3.0]   | 2.0 [1.0-3.5]                | 2.0 [1.0-3.0]       |
| <b>Total hospital bed days</b>            |                 |                              |                     |
| N                                         | 44              | 23                           | 21                  |
| Mean (SD)                                 | 12.7 (12.7)     | 16.3 (14.7)                  | 8.8 (8.7)           |
| Median [Q1-Q3]                            | 8.5 [3.5-19.5]  | 14.0 [5.0-24.0]              | 6.0 [3.0-11.0]      |
| <b>Total GP practice visits</b>           |                 |                              |                     |
| N                                         | 17              | 11                           | 6                   |
| Mean (SD)                                 | 9.8 (11.3)      | 9.8 (12.6)                   | 9.8 (9.6)           |
| Median [Q1-Q3]                            | 8.0 [3.0-11.0]  | 8.0 [3.0-11.0]               | 6.5 [3.0-16.0]      |
| <b>Specialist palliative care contact</b> |                 |                              |                     |
| No                                        | 29 (63%)        | 17 (68%)                     | 12 (57%)            |
| Yes                                       | 17 (37%)        | 8 (32%)                      | 9 (43%)             |
| <b>Death</b>                              |                 |                              |                     |
| No                                        | 17 (37%)        | 10 (40%)                     | 7 (33%)             |
| Yes                                       | 29 (63%)        | 15 (60%)                     | 14 (67%)            |
| <b>Place of death</b>                     |                 |                              |                     |
| Home                                      | 12 (41%)        | 8 (53%)                      | 4 (29%)             |
| Hospice                                   | 8 (28%)         | 3 (20%)                      | 5 (36%)             |
| Hospital                                  | 9 (31%)         | 4 (27%)                      | 5 (36%)             |
| <b>Pre UK lockdown* - place of death</b>  |                 |                              |                     |
| Home                                      | 7 (35%)         | 5 (50%)                      | 2 (20%)             |
| Hospice                                   | 6 (30%)         | 2 (20%)                      | 4 (40%)             |
| Hospital                                  | 7 (35%)         | 3 (30%)                      | 4 (40%)             |
| <b>Post UK lockdown* - place of death</b> |                 |                              |                     |
| Home                                      | 5 (56%)         | 3 (60%)                      | 2 (50%)             |
| Hospice                                   | 2 (22%)         | 1 (20%)                      | 1 (25%)             |

**S5.4 continued:****4. Clinical Outcomes****Table 4.4. Service use.**

|                                             | <b>All N=46</b> | <b>Intervention<br/>N=25</b> | <b>Control N=21</b> |
|---------------------------------------------|-----------------|------------------------------|---------------------|
| Hospital                                    | 2 (22%)         | 1 (20%)                      | 1 (25%)             |
| <b>Main cause of death</b>                  |                 |                              |                     |
| Cancer                                      | 21 (84%)        | 13 (93%)                     | 8 (73%)             |
| Cancer complication                         | 2 (8%)          | 0 (0%)                       | 2 (18%)             |
| Haematemesis                                | 1 (4%)          | 0 (0%)                       | 1 (9%)              |
| Pulmonary Embolism and<br>Pancreatic Cancer | 1 (4%)          | 1 (7%)                       | 0 (0%)              |
| Missing                                     | 4 ()            | 1 ()                         | 3 ()                |

Numbers are n (%) or n, mean (SD), median [Q1-Q3].

\*Date of UK lockdown - 23rd March 2020.

Abbreviations: N, number; Q, quartile; SD, standard deviation.

**S5.5:****4. Clinical Outcomes****Table 4.5: Time-to-event data.**

| <i>Time in weeks</i>                                                                                                                                                          | <i>All N=46</i>  | <i>Intervention<br/>N=25</i> | <i>Control N=21</i> |
|-------------------------------------------------------------------------------------------------------------------------------------------------------------------------------|------------------|------------------------------|---------------------|
| <b>MDT review meeting to first GP contact</b>                                                                                                                                 |                  |                              |                     |
| N                                                                                                                                                                             | 15               | 9                            | 6                   |
| Mean (SD)                                                                                                                                                                     | 9.5 (7.2)        | 7.6 (5.5)                    | 12.4 (9.1)          |
| Median [Q1-Q3]                                                                                                                                                                | 7.4 [2.6-14.9]   | 7.3 [3.6-8.9]                | 13.1 [2.6-19.4]     |
| <b>Last GP contact to death</b>                                                                                                                                               |                  |                              |                     |
| N                                                                                                                                                                             | 10               | 6                            | 4                   |
| Mean (SD)                                                                                                                                                                     | 2.2 (3.0)        | 2.5 (3.9)                    | 1.8 (1.5)           |
| Median [Q1-Q3]                                                                                                                                                                | 1.1 [0.3-2.4]    | 1.0 [0.1-2.4]                | 1.7 [0.6-3.0]       |
| <b>Last oncology treatment to death</b>                                                                                                                                       |                  |                              |                     |
| N                                                                                                                                                                             | 27               | 15                           | 12                  |
| Mean (SD)                                                                                                                                                                     | 17.3 (14.9)      | 14.5 (12.1)                  | 20.8 (17.7)         |
| Median [Q1-Q3]                                                                                                                                                                | 12.7 [7.4-20.4]  | 11.4 [7.4-18.3]              | 13.2 [9.5-25.0]     |
| <b>MDT review meeting to death</b>                                                                                                                                            |                  |                              |                     |
| N                                                                                                                                                                             | 29               | 15                           | 14                  |
| Mean (SD)                                                                                                                                                                     | 31.7 (18.6)      | 31.4 (18.0)                  | 32.1 (19.9)         |
| Median [Q1-Q3]                                                                                                                                                                | 30.6 [17.0-42.9] | 28.6 [17.0-47.3]             | 34.5 [12.6-42.9]    |
| <b>MDT review meeting to updated KIS</b>                                                                                                                                      |                  |                              |                     |
| N                                                                                                                                                                             | 37               | 20                           | 17                  |
| Mean (SD)                                                                                                                                                                     | 24.4 (19.2)      | 24.3 (20.0)                  | 24.5 (18.8)         |
| Median [Q1-Q3]                                                                                                                                                                | 18.6 [7.6-42.9]  | 16.2 [6.0-44.9]              | 18.9 [9.6-33.0]     |
| <b>MDT review meeting to SPC referral</b>                                                                                                                                     |                  |                              |                     |
| N                                                                                                                                                                             | 17               | 8                            | 9                   |
| Mean (SD)                                                                                                                                                                     | 20.8 (17.4)      | 27.3 (20.3)                  | 15.0 (12.7)         |
| Median [Q1-Q3]                                                                                                                                                                | 18.9 [4.4-33.9]  | 26.4 [9.1-48.4]              | 11.6 [3.7-22.4]     |
| Numbers are n, mean (SD), median [Q1-Q3].<br>Abbreviations: MDT, multidisciplinary team; N, number; Q, quartile;<br>SPC, specialist palliative care ; SD, standard deviation. |                  |                              |                     |

## S5.5 continued:

| <i>Time in weeks</i>                                                                                                                                                          | <i>All N=46</i> | <i>Intervention<br/>N=25</i> | <i>Control N=21</i> |
|-------------------------------------------------------------------------------------------------------------------------------------------------------------------------------|-----------------|------------------------------|---------------------|
| <b>Date randomised to first oncology treatment</b>                                                                                                                            |                 |                              |                     |
| N                                                                                                                                                                             | 40              | 22                           | 18                  |
| Mean (SD)                                                                                                                                                                     | 1.8 (2.8)       | 1.5 (2.2)                    | 2.2 (3.5)           |
| Median [Q1-Q3]                                                                                                                                                                | 1.7 [0.5-2.6]   | 1.7 [0.4-2.3]                | 1.7 [0.7-2.7]       |
| <b>Date randomised to first GP practice visit</b>                                                                                                                             |                 |                              |                     |
| N                                                                                                                                                                             | 15              | 9                            | 6                   |
| Mean (SD)                                                                                                                                                                     | 5.2 (6.6)       | 4.0 (5.9)                    | 6.8 (7.7)           |
| Median [Q1-Q3]                                                                                                                                                                | 3.0 [0.6-11.4]  | 3.0 [1.7-7.3]                | 3.4 [0.6-16.6]      |
| <b>Date randomised to updated KIS</b>                                                                                                                                         |                 |                              |                     |
| N                                                                                                                                                                             | 37              | 20                           | 17                  |
| Mean (SD)                                                                                                                                                                     | 20.1 (18.1)     | 19.7 (18.9)                  | 20.5 (17.7)         |
| Median [Q1-Q3]                                                                                                                                                                | 15.0 [4.0-38.1] | 13.3 [3.2-39.6]              | 15.0 [7.9-25.9]     |
| <b>Date randomised to last oncology treatment</b>                                                                                                                             |                 |                              |                     |
| N                                                                                                                                                                             | 39              | 21                           | 18                  |
| Mean (SD)                                                                                                                                                                     | 17.3 (18.6)     | 20.1 (22.1)                  | 14.0 (13.3)         |
| Median [Q1-Q3]                                                                                                                                                                | 10.1 [6.7-21.6] | 10.1 [6.9-28.3]              | 10.0 [6.7-16.0]     |
| <b>Date randomised to SPC referral</b>                                                                                                                                        |                 |                              |                     |
| N                                                                                                                                                                             | 17              | 8                            | 9                   |
| Mean (SD)                                                                                                                                                                     | 16.0 (15.3)     | 20.7 (18.2)                  | 11.9 (11.9)         |
| Median [Q1-Q3]                                                                                                                                                                | 12.1 [3.0-19.9] | 17.0 [7.1-37.1]              | 10.9 [2.9-16.6]     |
| <b>SPC referral to death</b>                                                                                                                                                  |                 |                              |                     |
| N                                                                                                                                                                             | 16              | 7                            | 9                   |
| Mean (SD)                                                                                                                                                                     | 10.6 (12.4)     | 9.2 (5.8)                    | 11.8 (16.1)         |
| Median [Q1-Q3]                                                                                                                                                                | 5.1 [3.5-12.6]  | 6.7 [4.1-13.4]               | 3.9 [3.3-8.7]       |
| Numbers are n, mean (SD), median [Q1-Q3].<br>Abbreviations: MDT, multidisciplinary team; N, number; Q, quartile;<br>SPC, specialist palliative care ; SD, standard deviation. |                 |                              |                     |
